# Supplementary material for: Greenhouse Gas and Carbon Profile of the US Forest Products Industry: 1990 to 2020
Source: Research Square preprint supplement (doi:10.21203/rs.3.rs-8290322/v1), 2025-12-26
Supplement: Supplementary file 1 [file 3815d90a5cc58d3a1f42e231.docx]

**SUPPLEMENTARY INFORMATION: DATA AND CALCULATION METHODS**

For

**Greenhouse Gas and Carbon Profile of the US Forest Products Industry: 1990 TO 2020**

**Contents**

[CARBON STORED IN FOREST PRODUCTS 3](#_Toc215829599)

[Carbon Stored in Products in Use 3](#_Toc215829600)

[Carbon Stored in Products in Landfills 5](#_Toc215829601)

[Total Carbon Storage in Forest Products 5](#_Toc215829602)

[GREENHOUSE GAS EMISSION FACTORS 8](#_Toc215829603)

[SCOPE 1 COMBUSTION-RELATED GHG EMISSIONS 8](#_Toc215829604)

[Pulp and Paper Mill Emissions 9](#_Toc215829605)

[Wood Products Mills 15](#_Toc215829606)

[Biogenic Emissions from Forest Product Industry Manufacturing 18](#_Toc215829607)

[Converting Operations 19](#_Toc215829608)

[Total Forest Products Industry Direct Emissions from Fuel Combustion 24](#_Toc215829609)

[SCOPE 2 INDIRECT EMMISSIONS ASSOCIATED WITH PURCHASED ELECTRICITY AND STEAM 25](#_Toc215829610)

[Pulp and Paper Mills 25](#_Toc215829611)

[Wood Products Mills 29](#_Toc215829612)

[Converting Operations 31](#_Toc215829613)

[Total Forest Products Industry 34](#_Toc215829614)

[SCOPE 3 INDIRECT EMISSIONS ASSOCIATED WITH PURCHASED ELECTRICITY AND STEAM 35](#_Toc215829615)

[FACTORS FOR PRODUCING NON-FIBER NON-FUEL INPUTS 37](#_Toc215829616)

[EMISSIONS FROM SYSTEMS MANAGING FOREST PRODUCT INDUSTRY WASTES 37](#_Toc215829617)

[Emissions from Landfills Receiving Pulp and Paper Mill Wastes 37](#_Toc215829618)

[Emissions from Wood Product Facility Landfills – Lumber Mills 53](#_Toc215829619)

[Emissions from Wood Product Facility Landfills – Panel Plants 56](#_Toc215829620)

[CALCULATING TRANSPORT-RELATED EMISSIONS 58](#_Toc215829621)

[Using Data from the Commodity Flow Survey 58](#_Toc215829622)

[Transport Emissions from Roundwood Shipments 62](#_Toc215829623)

[Transport Emissions from Wood Product Shipments 62](#_Toc215829624)

[Transport Emissions from Paper Product Shipments 65](#_Toc215829625)

[Emissions from Pellet Transport 67](#_Toc215829626)

[Emissions from Transporting Non-Fiber, Non-Fuel Inputs to Manufacturing 67](#_Toc215829627)

[EMISSIONS FROM NON-INDUSTRIAL USE OF WOOD-BASED FUELS 68](#_Toc215829628)

[DATA AND CALCULATIONS OF END-OF-LIFE EMISSIONS FOR FOREST PRODUCTS 68](#_Toc215829629)

[REFERENCES 78](#_Toc215829630)

**ALIGNMENT WITH THE GHG PROTOCOL**

An attempt has been made to include all relevant emission categories addressed in the GHG Protocol Corporate Standard1 (which covers Scope 1 and 2 emissions) and the GHG Protocol Value Chain (Scope 3) Standard2. For the purposes of this report, Scope 1 emissions are those from manufacturing and converting operations in the forest products value chain. Scope 2 emissions are those released by producers of electricity and steam purchased by the forest products industry. Scope 3 emissions are all other emissions in the forest products industry value chain. For a complete description of the emissions Scope concept, see the GHG Protocol Corporate Standard1. The 15 categories in the Scope 3 Standard are shown in Table S1. Those included in this study are identified. Excluded categories are either assumed to be so small as to be immaterial (i.e., capital goods, business travel, and employee commuting) or are considered irrelevant to an industry-wide inventory focused on the manufacturing value chain (i.e., upstream leased assets, downstream leased assets, and franchises not associated with the value chain).

This study does not include carbon credits (e.g., renewable energy credits or RECS) purchased or sold by the forest products industry

**Table S1.** GHG Protocol Scope 3 Categories Included in this Study

| **GHG Protocol Value Chain (Scope 3) Standard Category** | **Included in this Study?** |
| --- | --- |
| 1. Purchased goods and services | Included |
| 2. Capital goods | Not included |
| 3. Fuel- and energy-related activities (not in Scope 1 or 2) | Included |
| 4. Upstream transportation and distribution | Included |
| 5. Waste generated in operations | Included |
| 6. Business travel | Not included |
| 7. Employee commuting | Not included |
| 8. Upstream leased assets | Included if part of the value chain |
| 9. Downstream transportation and distribution | Included |
| 10. Processing of sold products | Included |
| 11. Use of sold products | Included |
| 12. End-of-life treatment of sold products | Included |
| 13. Downstream leased assets | Included if part of the value chain |
| 14. Franchises | Included if part of the value chain |
| 15. Investments | Included if part of the value chain |

The structure of this study reflects, in large part, the way available data and methods are organized. The elements of this study and the approximate alignment with the 15 categories (Table S1) are shown in Table S2. The alignment is not exact, however. Details of the calculations for each element are contained in this report.

Net transfers of biogenic carbon to the atmosphere are estimated by “production accounting.” Using this approach, the net transfers of biogenic carbon are calculated as the net changes in stocks of stored carbon attributable to wood harvested in the US (e.g., see USEPA 20223). Mathematically, this provides the same estimate as adding the flows of biogenic carbon to and from the atmosphere along the value chain associated with wood harvested in the US.

**Table S2.** Elements in GHG Profile and Approximate Comparison to GHG Protocol Categories

| **Element Description in this Study** | **GHG Protocol Category** |
| --- | --- |
| Changes in forest ecosystem carbon stocks | Not included in Corporate or Scope 3 Standards |
| Changes in forest product carbon stocks | Not included in Corporate or Scope 3 Standards |
| Scope 1 Fuel Combustion | Corporate Standard and Scope 3 category 10 (processing of sold products) |
| Scope 2 | Corporate Standard and Scope 3 category 10 (processing of sold products) |
| Waste management | Scope 3 category 5 (waste generated in operations) |
| Transport | Scope 3 category 4 (upstream transportation and distribution)  Scope 3 category 9 (downstream transportation and distribution) |
| Upstream – Purchased electricity | Scope 3 category 1 (purchased goods and services) |
| Upstream – Nonfiber input production | Scope 3 category 1 (purchased goods and services) |
| Upstream – Fossil fuel production & transport | Scope 3 category 3 (fuel- and energy-related activities [not included in Scope 1 or Scope 2]) |
| Product use | Scope 3 category 11 (use of sold products) |
| Wood supply production | Scope 3 category 1 (purchased goods and services) |
| Product end-of-life | Scope 3 category 12 (end-of-life treatment of sold products) |

# **CARBON STORED IN FOREST PRODUCTS**

Much of the carbon removed from forests by industry is transferred into products. These products store carbon during use and sometimes continue to store carbon in landfills. Small amounts of carbon are also stored in landfills receiving forest products manufacturing wastes, but the amounts of carbon are small and are not included in this report. Emissions of methane from industry landfills, however, are included and discussed elsewhere.

US EPA publishes estimates of annual changes in stocks of carbon in forest products in its annual inventory of US GHG emissions and sinks. USAEPA’s estimates, which are developed for EPA by the US Forest Service, are used in this report to quantify carbon in forest products3 4.

## **Carbon Stored in Products in Use**

After manufacturing, forest products remain in use for periods varying from days to centuries. Carbon remains stored during this time, delaying its return to the atmosphere. If carbon is added to the pool of products in use faster than it is being removed by the retirement of older products, stocks of carbon in this pool grow.

Estimates of annual changes in carbon held in forest products in use are reported annually in the US inventory of GHGs and sinks. The values in Table S3 are from that report. (The estimates and their derivation are detailed in USEPA’s 2022 Inventory, Annex 3, Section 3.13.4)

US EPA’s analysis shows that annual changes in stocks of carbon in use are small compared to the amounts already in use. The amount leaving the pool of products in use is relatively constant compared to the year-to-year change in inputs to this pool (i.e., new production). As a result, changes in industry production have a large impact on the annual changes in carbon stocks in use.

**Table S3**. Stocks of Carbon in US Forest Products in Use4

| Year | Net C Additions,  Million Metric Tons C/yr | Total C Stocks,  Million Metric Tons C |
| --- | --- | --- |
| 1990 | 14.9 | 1,249 |
| 2005 | 11.6 | 1,447 |
| 2020 | 8.8 | 1,530 |

The estimates shown in Table S3 were developed for USEPA by the US Forest Service using the “production approach.” Under the production approach, any carbon stock change attributable to wood harvested in the US is included in the US’s results. This is true even if the wood or forest products are exported and used in other countries. Conversely, changes in domestic stocks of carbon are not included if they are associated with wood produced elsewhere.

The primary reason for the decline in annual additions between 1990 and 2005 was decreasing domestic harvest. The correlation between domestic harvest and annual changes in stocks of carbon in products in use is evident in Figure S1.

**Figure S1**. Changes in Harvested Wood and Product-in-Use Carbon

Between 1990 and 2006 the decline in domestic wood production was gradual, but the 2007–2009 recession caused a dramatic downturn in harvesting of wood, which had the expected impact on changes in stocks of carbon in products in use. Wood production and in-use carbon stocks subsequently increased.

The years examined in the 2008 profile were 1990 and 2004/2005. For this update, 2020 is added and, where possible, 2005 is used as a historical comparison (instead of 2004/2005). The stocks of carbon in the products-in-use pool grew by 14.9 million metric tons C in 1990, 11.6 million metric tons C in 2005, and 8.8 million metric tons C in 2020. The growth in stocks of carbon in products in use represented removals of CO2 from the atmosphere of 54.6, 42.5, and 32.3 million metric tons of CO2 in 1990, 2005, and 2020, respectively.

The stock change values for 1990 and 2005 in this update differ from those reported in Heath et. al. 20105. The primary reason is that, in recent inventories, USEPA updated its past estimates based on updated analysis by the US Forest Service. USEPA lowered the 1990 increase in stocks of in-use carbon to 14.9 from 17.7 million metric tons C. Likewise, the estimated increase for 2005 has been reduced to 11.6 from 12.1 in earlier USEPA inventory reports.

## **Carbon Stored in Products in Landfills**

Forest products are recycled or discarded after use, with some going to landfills. Landfills gain carbon as new discards are added and lose carbon as products degrade into a mixture of methane and CO2. The annual balance between gains and losses determines whether stocks of biogenic carbon in landfills increase or decrease. US EPA’s annual inventories of GHG emissions and sinks include estimates of landfill forest product carbon stock changes3,4. For this profile, we use those estimates and update the Heath et al.5 values to allow consistent comparisons with previous periods. As for products in use, these calculations are developed by the US Forest Service using the production approach. Under the production approach, any carbon stock change in landfills attributable to wood harvested in the US is included in the US’s results. This is true even if the landfills are in other countries. The changes in landfill carbon stocks attributable to forest products produced in the US are shown in Table S4.

**Table S4**. Stocks and Stock Changes of Carbon in Forest Products in US Landfills4

| Year | Net C Additions,  Million Metric Tons C/yr | Total C Stocks,  Million Metric Tons C |
| --- | --- | --- |
| 1990 | 18.8 | 646 |
| 2005 | 17.3 | 906 |
| 2020 | 17.6 | 1,165 |

As is the case for carbon in products in use, carbon stocks in landfills are much larger than the annual net changes. The net changes, however, are much less variable than changes in stocks of carbon in products in use. This is primarily because inputs to landfill carbon stocks are far less variable than inputs to the pool of products in use. From 1990 to 2020, annual changes in landfill carbon stocks ranged from 6% less to 9% greater than the mean change. The range for changes in stocks of carbon in products in use was much larger: from 19% below the mean to 76% above the mean.

Net additions to landfill carbon stocks in 1990, 2005, and 2020 were 18.8, 17.3, and 17.6 million metric tons C per year, respectively. These additions correspond to net removals of CO2 from the atmosphere of 68.9, 63.4, and 64.5 million metric tons CO2 per year in 1990, 2005, and 2020, respectively.

## **Total Carbon Storage in Forest Products**

In Figure S2, the contributions of wood products and paper to carbon stock changes are shown separately. The data series stops in 2013 because after that date, US EPA stopped showing the separate contributions of wood and paper 6. Annual changes in carbon stocks in products in use are highly dependent on changes in production rates for both wood and paper products. Indeed, during economic slowdowns, stocks of carbon in products in use can decrease (i.e., stocks change less than zero). Annual increases in stocks of carbon in wood products in use are consistently larger than those for paper due to the short time in use for paper products. Stocks of carbon in products in landfills increase annually over the entire record. This is because carbon in products continues to be added to landfills at a rate faster than decomposition removes carbon from landfills.

Total annual changes in carbon stocks attributable to forest products are shown in Figure S3. While in the early 1990s net additions to products in use were comparable to additions to landfills, carbon stock changes due to products in use decreased over time. The total change in carbon stocks attributable to forest products has also decreased over time. The total net additions in units of carbon and CO2 are shown in Tables S5 and S6. These additions were 33.8, 28.9, and 26.4 million metric tons C per year in 1990, 2005, and 2020, respectively. These correspond to total net removals from the atmosphere of 124, 106, and 96.8 million metric tons CO2 per year in 1990, 2005, and 2020, respectively. The 1990 and 2005 estimates are very close to those in Heath et al. 20105. This is not surprising as both are based on data and analysis from the US Forest Service.

**Figure S2**. Contributions of US Wood and Paper Products to Changes in Stocks of Carbon in Products in Use and in Landfills 6

**Figure S3**. Net Additions to Carbon Stocks in Forest Products Produced from Wood Harvested in the US 4

**Table S5**. Net Additions to US Carbon Stocks in 1990, 2005, and 2020 4

| Year | Net C Additions, Million Metric Tons C/yr | | | Fraction of 1990 Total | Fraction of 2005 Total |
| --- | --- | --- | --- | --- | --- |
| In Use | In Landfills | Total |
| 1990 | 14.9 | 18.8 | 33.8 | 1.00 |  |
| 2005 | 11.6 | 17.3 | 28.9 | 0.86 | 1.00 |
| 2020 | 8.8 | 17.6 | 26.4 | 0.78 | 0.91 |

**Table S6**. Net Emissions Attributable to Changes in Carbon Stocks in US Forest Products 4

| Year | Million Metric Tons CO2eq.a | | |
| --- | --- | --- | --- |
| Attributable to Products in Use | Attributable to Products in Landfills | Total |
| 1990 | −54.6 | −68.9 | −123.9 |
| 2005 | −42.5 | −63.4 | −106.0 |
| 2020 | −32.3 | −64.5 | −96.8 |

a Negative sign indicates a net removal of CO2 from the atmosphere.

# **GREENHOUSE GAS EMISSION FACTORS**

Fuel-specific emission factors 7 and GWPs 8 published by the Intergovernmental Panel on Climate Change were used to convert subsector fuel use data into Scope 1 GHG emissions. However, in calculating CO2e emissions for CH4 and N2O from biomass combustion, factors from the World Resources Institute/World Business Council for Sustainable Development 9 were used because of their better representation of CH4 and N2O emissions from US pulp and paper facilities. Note that only GHG contributions of CH4 and N2O are considered for biomass fuels. GWPs of 25 and 298 are used for CH4 and N2O, respectively, as these values are required under US EPA’s GHGRP 10. Biogenic CO2 emissions are not included in calculations of GHG emission totals as they are accounted for in the biomass carbon stock change calculations (see US EPA 202211,12 for more information on biogenic carbon accounting). Nonetheless, these emissions are included for informational purposes, as required in the GHG Protocol Corporate Standard1.

GHG emission factors for purchased electricity are taken from eGRID 13 and are based on national averages for a given reporting year. Purchased electricity emission factors from eGRID date back to 1996. eGRID factors from 1996 have been applied to calculate GHG emissions from purchased electricity prior to 1996. Purchased steam emission factors over time are based on the approach used in US DOE Instructions for Form EIA‑160514 but using time series EIA MECS data15. In form EIA‑1605, the purchased steam emission factor is based on the weighted average from EIA’s 1998 MECS data on quantities of natural gas, coal, and residual and distillate fuel oils consumed as boiler fuel, carbon coefficients provided in EIA's Assumptions to the Annual Energy Outlook 200316 , and EIA/OIAF efficiency assumptions of 80%, 81%, and 82% for natural gas, coal, and petroleum boilers, respectively. The value also includes 10% loss during transmission. Emission intensities were calculated by dividing GHG emissions by 2018 sector-wide production amounts17,18.

# **SCOPE 1 COMBUSTION-RELATED GHG EMISSIONS**

The forest products industry both purchases and self-generates fuels, electricity, and steam to power its production processes. In this profile, emissions from the combustion of fuels at manufacturing and converting operations are classified as Scope 1 emissions. The emissions released from facilities producing electricity or steam purchased by these operations are accounted for as Scope 2 emissions. Emissions are also released in the production and transport of fuels used by the forest products industry and by its suppliers of electricity and steam. These are Scope 3 emissions.

Historical energy and production data for the US forest products industry have been used to calculate fuel-related GHG trends for the industry since 1990 on both an absolute basis (mass of GHG emissions) and an intensity basis (mass of GHG emissions per unit of production). Direct emissions are reported in units of CO2e and calculated as the sum of carbon dioxide (CO2), methane (CH4), and nitrous oxide (N2O) from on-site fossil fuel sources and CH4 and N2O emissions from on-site biomass fuel sources. Global warming potentials (GWPs) of 25 and 298 are used for CH4 and N2O, respectively. Details on emission factor sources and GWPs used in calculations are provided above.

## **Pulp and Paper Mill Emissions**

*Data Sources*

US Energy Information Administration Manufacturing Energy Consumption Survey

The US Energy Information Administration (EIA) collects information on manufacturing energy use every 4 years as part of its manufacturing energy consumption survey (MECS) effort 15. While the first EIA MECS was conducted in 1985, detailed energy consumption tables are only available for 1991, 1994, 1998, 2002, 2006, 2010, 2014, and 2018. In terms of industry coverage, the 2018 EIA MECS sample of approximately 15,000 establishments was drawn from a nationally representative sample representing 97 to 98% of the manufacturing payroll. EIA MECS data are considered representative of the entire US pulp and paper industry.

American Forest and Paper Association/American Paper Institute

The American Forest and Paper Association (AF&PA) and its predecessor, the American Paper Institute (API), have regularly collected industry fuel, energy, and production information. The AF&PA/API fuel, energy, and production data set from 1972 to 2018 was used in this analysis17,19. For the years 2000 to 2020, the fuel and energy data sets represent only AF&PA members. Therefore, these results were scaled based on a production scaling factor of total US paper, paperboard, and market pulp production from sector-wide production amounts 17,19 divided by AF&PA member paper, paperboard, and market pulp production for each data year. Throughout this report, AF&PA and API data are referred to as “AF&PA” or “AF&PA/API” in tables and figures.

US EPA Greenhouse Gas Reporting Program

The Greenhouse Gas Reporting Program (GHGRP) managed by the US EPA requires reporting of GHG data and other relevant information from large GHG emission sources, fuel and industrial gas suppliers, and CO2 injection sites in the US 10. Approximately 8,000 facilities are required to report emissions annually, and the reported data are made available to the public in October of each year. Data reported by the US pulp and paper industry are available annually from 2010 to 2021 10. Generally, the GHGRP requires reporting by facilities emitting more than 25,000 mt CO2eq. per year. Approximately 85 to 90% of total GHG emissions in the US are represented by the GHGRP data sets. GHGRP coverage for the pulp and paper sector is estimated to represent essentially 100% of industry emissions from chemical pulp and paper manufacturing and 84 to 95% of emissions from other paper and paperboard sectors.

*Greenhouse Gase Emissions on an Absolute Basis*

The fuel-related direct emissions from the pulp and paper sector in 1990, 2005, and 2020 are shown in Table S7. The trends in these emissions are shown in Figure S4. Direct GHG emissions peaked in 1994 for the US pulp and paper industry before decreasing, driven by switching to less GHG-intense fuels, energy efficiency improvements, and production reductions within the industry over time.

Since 1990, direct GHG emissions for the US paper, paperboard, and market pulp sector have been reduced by 51%, a result consistent with EIA MECS. Since 2005, emissions have been reduced by 40%.

**Table S7.** Direct Fuel Combustion-Related Emissions from the US Paper, Paperboard, and Market Pulp Sector

|  | Million Metric Tons CO2 e | | Based on AF&PA Data | |
| --- | --- | --- | --- | --- |
|  | AF&PA | EPA GHGRP | Fraction of 1990 Emissions | Fraction of 2005 Emissions |
| 1990 | 66.9 | -- | 1.00 |  |
| 2005 | 55.2 | -- | 0.83 | 1.00 |
| 2020 | 33.0 | 34.9 | 0.49 | 0.60 |

**Figure S4.** Direct GHG Emissions Over Time for the US Pulp and Paper Industry

*Greenhouse Gase Emissions on an Intensity Basis*

Figure S5 shows GHG reductions for the US pulp and paper sector on an intensity basis calculated from EIA MECS and AF&PA data. Since 1990, direct GHG emission intensities for the US pulp and paper sector have been reduced by 48% (0.83 metric tons CO2eq. per metric ton production in 1990 vs. 0.43 in 2020).

**Figure S5.** Direct US Pulp and Paper Sector GHG Emission Intensity Changes Over Time

*Increased Utilization of Biomass*

The US pulp and paper industry derives most of its energy needs from biomass fuels. Biomass use is often expressed as a percentage of total “fenceline energy”, defined as the amount of fuel and energy consumed within a facility measured at the operational or ownership boundary of the facility. Based on AF&PA data, biomass use, as a percentage of fenceline energy, increased from 56% in 1990 to 65% in 2018. Likewise, EIA MECS data show biomass fuel use increasing from 53% of fenceline energy needs in 1991 to 63% in 2018. Figure S6 shows trends in biomass energy utilization over time for the US pulp and paper industry.

**Figure S6.** Biomass Energy as Percent of Total Fenceline Energy Use

*Fuel Switching to Less Greenhouse Gas–Intense Fuels*

The on-site energy mix for the US pulp and paper industry over time, based on EIA MECS data, is shown in Figure S7. In 1991, coal and other fossil fuels (primarily residual fuel oil) represented 13% and 7% of the on-site energy mix, respectively. In 2018, the coal contribution decreased to 3%, and the other fossil fuels’ contribution decreased to 1%. Between 1991 and 2018, the natural gas energy contribution increased from 20% to 26%, and the biomass energy contribution increased from 53% to 63%. Switching from more GHG-intense fuels, such as coal and residual fuel oil, to less GHG-intense fuels, such as natural gas and biomass, has contributed to GHG reductions on both intensity and absolute bases for the US pulp and paper industry.

**Figure S7.** On-site Energy Mix Over Time for the US Pulp and Paper Industry Based on EIA MECS Data

*Energy Intensity Improvements*

The overall energy intensity of the US pulp and paper sector has decreased over time as mills have implemented energy efficiency improvements and installed more energy-efficient equipment. There have also been structural changes within the US pulp and paper sector. For instance, printing and writing production, which in general involves more energy-intense production processes, has declined while packaging production, which in general is less energy intensive, has increased. Figure S8 shows trends in total fenceline energy intensity over time. Both AF&PA and EIA MECS data suggest, however, that energy intensity has been relatively constant since 2005.

**Figure S8.** Changes in Total Fenceline Energy Intensity Over Time

Figure S9 shows total fenceline energy intensity over time divided between fossil fuels, net purchased electricity and steam, and biomass and other renewables, based on AF&PA/API data. Biomass use has remained essentially constant at approximately 15 million BTU HHV/short ton of production, but the share of fossil fuel, net purchased electricity, and steam has decreased over time.

**Figure S9.** Changes in Total Fenceline Energy Intensity Over Time and Changes in Biomass and Fossil Energy Share

*Production Reductions*

Figure S10 shows changes in production of paper, paperboard, and market pulp for the US pulp and paper industry over time. Production peaked in approximately 1999 and has declined since. There was an approximately 25% reduction in production between 1999 and 2020. The reduction has driven decreases in absolute GHG emissions as well as indirectly influenced GHG emission intensities. Shuttered production over time in the US has tended to be associated with older, less energy-efficient facilities, and closure of these facilities has led to overall improvements in both energy intensity and GHG intensity in the industry. In addition, increased reliance on recovered fiber as a fraction of fiber supply has contributed to the decline in energy intensity. AF&PA data indicate that wood pulp consumption in the US declined by approximately 23% between 2005 and 2020, while recovered fiber consumption declined by about 8% 18.

**Figure S10.** Changes in US Pulp and Paper Production Over Time 20

## **Wood Products Mills**

Combustion-related emissions from wood product facilities were calculated from energy consumption data in MECS reports from 1991 through 2018 and wood products production from FAOSTAT’s Forestry Production and Trade database 20. Emissions from primary manufacturing were estimated by summing the subsector values for NAICS 321 (wood products). (NAICS is the North American Industry Classification System. It replaced the Standard Industrial Classification (SIC) system in 1997.) The subsectors are NAICS 32113 (sawmills), NAICS 3212 (veneer, plywood, and engineered wood products), and NAICS 3219 (other wood products). The difference between the NAICS 321 total and the sum of the subsectors was assigned to wood products converting. In the case of wood products, the changeover to NAICS codes from Standard Industrial Classification (SIC) codes in 1997 makes it difficult to interpret the subsector data for 1991 and 1994, so only the sector totals are used for 1991 and 1994. This difficulty was not encountered in the pulp and paper sector, where the alignment between NAICS and SIC codes was clearer. As a result, there is no residual (i.e., the difference between the sector total and the sum of subsectors) to assign to wood products converting for 1991 and 1994. Instead, these converting-related emissions are included with primary manufacturing emissions.

The US production data for wood products are shown in Figure S11. Output increased slowly from 1990 to 2005, dropped during the recession of 2007 to 2009, and then slowly increased from 2010 to 2018.

Emissions, calculated from EIA MECS energy data, are shown in Figure S12 and follow a pattern similar to that of wood products production. The on-site energy mix for the US wood products sector is given in Figure S13. Biomass energy sources provided approximately two-thirds of the energy needs for the wood products sector between 1991 and 2018. For this profile, the EIA MECS–based emissions for 1991, 2006, and 2018 are used to represent the years 1990, 2005, and 2020. As noted previously, the values for primary manufacturing subsectors and the total for NAICS 321 are the same for 1990 and 1994 due to the change from SIC codes to NAICS codes in 1997. Table S8 shows emissions and changes over time.

**Figure S11.** Production of US Wood Products 20

**Figure S12.** Emissions from US Wood Products Facilities 15

(Note: US Department of Energy withheld 2010 MECS data for distillate oil for sawmills due to confidentiality concerns. For this report, a value equal to the average of 2006 and 2014 was used.)

**Figure S13.** On-site Energy Mix Over Time for the US Wood Products Industry 15

**Table S8.** Combustion-Related Emissions from US Wood Products Primary Manufacturing15 (Total of Subsectors for NAICS 321)

|  | Emissions Million Metric Tons CO2e | Fraction of 1990 Emissions | Fraction of 2005 Emissions |
| --- | --- | --- | --- |
| 1990 (EIA MECS 1991) | 3.6 | 1.00 |  |
| 2005 (EIA MECS 2006) | 6.0 | 1.65 | 1.00 |
| 2020 (EIA MECS 2018) | 4.8 | 1.32 | 0.80 |
|  |  |  |  |

## **Biogenic Emissions from Forest Product Industry Manufacturing**

In this profile, biogenic carbon is accounted for using production accounting, the same approach used by US EPA in the annual national inventory of emissions and sinks. In production accounting, transfers of biogenic CO2 to the atmosphere are calculated as losses in overall stocks of stored biogenic carbon. (See USEPA inventory reports 3,4 for more discussion of production accounting). Flows of biogenic carbon to the atmosphere are not included in GHG emission totals as this would double count the quantities accounted for in the biogenic carbon stock change calculations applied to carbon in forests and forest products. Nonetheless, some reporting protocols, including the GHG Protocol Corporate Standard 1, require that emissions of biogenic CO2 be “reported separately.” For this reason, this update includes a summary of biogenic CO2 emissions from forest products manufacturing.

The forest products sector is unique among industrial sectors in that most energy requirements for the sector are derived from biomass energy sources. In 2018, 63% of fenceline energy needs for the US pulp and paper sector and 60% of fenceline energy needs for the US wood products sector were derived from biomass fuels. Biogenic carbon dioxide emissions have ranged between 135.7 and 144.7 million metric tons per year over the last 30 years (Table S9). The industry’s biogenic carbon dioxide emissions are primarily from power boilers using biomass fuel, kraft mill recovery furnaces, and kraft mill lime kilns. Note that emissions from kraft lime kilns differ from CO2 emissions from cement industry kilns because approximately 61% of CO2 in kiln stack emissions from the pulp and paper sector are biomass-based 21. The remaining 39% are fossil-based emissions from the fuels combusted to generate the high temperatures needed to drive the calcination reaction. The biogenic emission contribution from lime kilns was approximately 9 million metric tons CO2eq. in 2018. Figure S14 shows the trends in biogenic carbon dioxide emissions for US forest products manufacturing over time.

**Table S9.** Biogenic Emissions from US Pulp and Paper and Wood Product Combustion Sources

| Year | Biogenic CO2 Emissions (Million Metric Tons) | | |
| --- | --- | --- | --- |
| Pulp and Paper | Wood Products | Total |
| 1991 | 118 | 26.7 | 144.7 |
| 2006 | 122 | 20.3 | 142.3 |
| 2018 | 115 | 20.7 | 135.7 |

**Figure S14.** Biogenic Carbon Dioxide Emissions from US Forest Products Manufacturing [Note: the numbers in the legend are NAICS codes]

## **Converting Operations**

In most cases, wood and paper products require additional manufacturing to produce final products. There are many so-called converting operations. In the case of paper and paperboard products, these include printing, packaging, cutting, folding and gluing, and many others. In the case of wood products, these include converting wood into furniture, housing, and many other products. Because of the great variety in converting operations, any estimate of emissions associated with this part of the forest products industry value chain is subject to considerable uncertainty.

This report contains estimates of emissions from some converting operations not included in the previous profile 5. In addition, methods to estimate process energy-related emissions have been improved compared to the previous profile. As a result, there are differences between the estimates presented herein and those published in Heath et al. 20105. Previous estimates have been revised, however, using the updated methods, allowing a consistent comparison of emissions in 1990, 2005, and 2020.

For this profile, estimates were drawn primarily from EIA MECS data. It is important to note that the EIA MECS data do not include all types of final processing operations performed on forest products. Also, for some EIA MECS sectors, materials other than forest products may be included in an NAICS code. Nonetheless, EIA MECS data provide a consistent series of data over time.

For the pulp, paper, and paperboard sector, the total for NAICS 322 was compared to the total of individual primary NAICS codes for subsectors within NAICS 322. These subsectors are NAICS 322110 (pulp mills), 322121 (paper mills except newsprint mills), 322122 (newsprint mills), and 322130 (paperboard mills). The amount by which the value for NAICS 322 was greater than the total for subcategories for primary manufacturing was assigned to converting operations. The results, shown in Figure S15, illustrate that, primarily because the residual values represent small differences between larger numbers, there is considerable variability in the emissions from NAICS 322 that are assigned to converting.

**Figure S15** Quantity of NAICS 322 Emissions Assigned to US Paper Converting

[Note: Equals the difference between NAICS 322 and NAICS 3221, the sum of pulp and paper subsectors]

To this residual contribution from NAICS 322 were added emissions associated with NAICS 323 (printing and related support). NAICS 323 can include printing on substrates other than paper and paperboard. Examination of the description of the sector suggests that paper and paperboard products are likely dominant, but it is clear that the sector includes operations printing on non-wood–based substrates. The emissions from NAICS 323 and the converting emissions residual from NAICS 322 are shown in Figure S16. The total of these two, representing the total emissions assigned to paper converting in this study, are also shown.

**Figure S16.** Direct Combustion-Related Emissions from US Converting Paper and Paperboard

Table S10 shows emissions in 1990, 2005, and 2018, assumed in this analysis to be equal to emissions in EIA MECS years 1991, 2006, and 2018, respectively.

**Table S10.** Direct Combustion-Related Emissions from US Paper and Paperboard Converting

|  | Emissions Million Metric Tons CO2e | Fraction of 1990 Emissions | Fraction of 2005 Emissions |
| --- | --- | --- | --- |
| 1990 (EIA MECS 1991) | 7.1 | 1.00 |  |
| 2005 (EIA MECS 2006) | 11.4 | 1.62 | 1.00 |
| 2020 (EIA MECS 2018) | 5.2 | 0.74 | 0.46 |

Like the paper and paperboard sector, any emissions from the overall wood products sector (NAICS 321) that exceeded the total for the individual subsectors were assigned to converting. The changeover to NAICS codes in 1997, however, makes it difficult to interpret the subsector data for 1991 and 1994; therefore, subsector data were not used for these years. As a result, there is no residual (i.e., the difference between the sector total and the sum of subsectors) to assign to converting for 1991 and 1994. This can be seen in the emissions plotted in Figure S17. Note, however, that any converting emissions included in the wood products total is accounted for in the results for 1991 and 1994 primary manufacturing of wood products.

**Figure S17.** Residual from NAICS 321 Assigned to US Wood Product Converting

For the wood products sector, the only additional EIA MECS data of relevance is furniture (NAICS 337). This includes all types of furniture, wood and non-wood. EIA MECS values were allocated to wood-based furniture based on 2020 data from the American Home Furnishing Alliance 22. Data from the American Home Furnishing Alliance indicate that approximately 17% of domestic furniture sales in 2020 were domestically produced wood furniture, and therefore, 17% of emissions calculated for NAICS 337 were assigned to wood converting operations. This may understate furniture-related emissions in earlier years, given that the production of wood furniture in the US has declined since 1990.

An additional contribution to emissions was added to account for those associated with home construction. About 70% of softwood lumber is used in housing, and 88% of lumber produced in the US is softwood 23. Furthermore, a significant fraction of other wood products (e.g., plywood and oriented strand board) is used in housing. There is, therefore, ample justification for including an estimate of the GHG emissions associated with the use of wood products for housing. Unfortunately, there are few robust estimates of these estimates. Puettmann et al. 24 examined the life cycle of several mass timber buildings in the US. It was estimated that the construction phase accounted for 3%–5% of the nonrenewable fuel use in the cradle to finished house portion of the life cycle. Most of the emissions in the cradle to gate portion of the life cycle of softwood lumber are associated with manufacturing 24–26; thus, for this profile, it was assumed that emissions associated with converting wood to final products other than furniture were 4% of the average primary manufacturing emissions from wood products mills (i.e., NAICS 321) for years with EIA MECS data. The uncertainty associated with this estimate is large.

The three components of wood products direct emissions from converting operations estimated in this study are shown in Figure S18. The contributions of home construction and furniture production are small compared to the amounts estimated from the difference between emissions from the overall wood products sector (NAICS 321) and the sum of the listed subsectors (sawmills, veneer, plywood and engineered wood products, and other wood products).

**Figure S18.** Components of Direct Fuel Combustion-Related Emissions from US Wood Product Converting Operations

The estimated direct emissions from wood product converting operations in 1990, 2005, and 2020 are shown in Table S11. The estimates for 1990, 2005, and 2020 are derived from EIA MECS 1991, 2006, and 2018 data, respectively. Figure 15 demonstrates that the changes over time are highly sensitive to the years selected and should be used with caution.

**Table S11.** Direct Combustion-Related Emissions from US Wood Product Converting15

|  | Emissions Million metric tons CO2e | Fraction of 1990 Emissions | Fraction of 2005 Emissions |
| --- | --- | --- | --- |
| 1990 (EIA MECS 1991)a | 0.4 | 1.00 |  |
| 2005 (EIA MECS 2006) | 1.8 | 4.29 | 1.00 |
| 2020 (EIA MECS 2018) | 0.6 | 1.51 | 0.35 |
| a 1991 values are low because these converting emissions are included in the wood products primary manufacturing emissions discussed earlier. | | | |

The total converting operation emissions associated with fuel combustion are shown in Figure S19. The reductions are shown in Table S12. The uncertainties in these estimates are large, and calculated reductions are highly dependent on the dates selected.

**Figure S19.** Direct GHG Emissions from Fuel Combustion Attributable to US Forest Product Converting Operations

**Table S12.** Changes in Direct Emissions from Fuel Combustion at US Forest Product Converting Operations 15

|  | Emissions Million Metric Tons CO2e | Fraction of 1990 Emissions | Fraction of 2005 Emissions |
| --- | --- | --- | --- |
| 1990 (EIA MECS 1991) | 7.5 | 1.00 |  |
| 2005 (EIA MECS 2006) | 13.2 | 1.77 | 1.00 |
| 2020 (EIA MECS 2018) | 5.9 | 0.79 | 0.44 |

## **Total Forest Products Industry Direct Emissions from Fuel Combustion**

The total combustion-related emissions from pulp, paper, paperboard, and wood products manufacturing in the US are shown in Table S13 and Figure S20. Approximately three-quarters of the 2020 emissions are associated with the pulp, paper, and paperboard primary manufacturing sector. The industry’s fuel combustion–related emissions in 2020 were reduced by 44% since 1990 and 41% since 2005.

**Table S13.** Combustion-Related Emissions from US Forest Products Sector Manufacturing

| Year | Million Metric Tons CO2e | Fraction of 1990 Emissions | Fraction of 2005 Emissions |
| --- | --- | --- | --- |
| 1990 | 78.0 | 1.00 |  |
| 2005 | 74.4 | 0.95 | 1.00 |
| 2020 | 43.6 | 0.56 | 0.59 |

**Figure S20.** Direct Combustion-Related Emissions from US Pulp and Paper and Wood Products Manufacturing

# **SCOPE 2 INDIRECT EMMISSIONS ASSOCIATED WITH PURCHASED ELECTRICITY AND STEAM**

Emissions from purchased electricity are calculated by multiplying electricity purchases by the associated GHG emission factor. Details on emission factor sources and GWPs used in calculations are shown above.

## **Pulp and Paper Mills**

*Data Sources*

Data sources are the same as those used to calculate direct fuel-related emissions, discussed previously.

*Greenhouse Gas Emissions on an Absolute Basis*

Figure S21 shows emissions and reductions in absolute terms attributed to purchased electricity and steam using AF&PA and EIA MECS data sets. Separate data are shown for gross purchases and net purchases of electricity. Emissions attributable to purchased steam account for about 9% (range from 5 to 13%) of emissions from gross purchases of steam and electricity. Since 2008, there has been accelerated greening of the US electrical grid, and most reductions in purchased electricity GHG emissions have been achieved since then. GHG emissions from purchased electricity were relatively constant between 1990 and 2008.

Because the AF&PA data set includes steam purchases, and because it is the more complete data set, it has been used to calculate changes over time in this analysis. Tables S14 and S15 show that emissions reductions from 1990 to 2020 are approximately 50% for both gross- and net-electricity–based estimates. The same is true for the period of 2005 to 2020. Emissions associated with net energy purchases (including steam) were 20.0%, 16.6%, and 17.7% lower than those based on gross purchases (including steam) in 1990, 2005, and 2020, respectively.

**Figure S21.** Changes in GHG Emissions Associated with Electricity and Steam Purchased by the US Pulp and Paper Sector

**Table S14.** Indirect Emissions Attributable to Gross Electricity and Steam Purchases in the US Paper, Paperboard, and Market Pulp Sector [*Source*: AF&PA data]

| Year | Million metric tons CO2e | Fraction of 1990 Emissions | Fraction of 2005 Emissions |
| --- | --- | --- | --- |
| 1990 | 32.3 | 1.00 |  |
| 2005 | 33.0 | 1.02 | 1.00 |
| 2020 | 16.5 | 0.51 | 0.50 |

**Table S15.** Indirect Emissions Attributable to Net Electricity Purchases in the US Paper, Paperboard, and Market Pulp Sector [*Source*: AF&PA/API data, purchased steam not included]

| Year | Million Metric Tons CO2e | Fraction of 1990 Emissions | Fraction of 2005 Emissions |
| --- | --- | --- | --- |
| 1990 | 24.1 | 1.00 |  |
| 2005 | 24.4 | 1.01 | 1.00 |
| 2020 | 11.7 | 0.48 | 0.48 |

*Greenhouse Gas Emissions on an Intensity Basis*

Figure S22 shows emission intensity reductions attributed to net purchased electricity over time. While the percent changes over time within EIA MECS data and AF&PA data are similar, EIA MECS emission intensities are consistently higher than indicated by AF&PA data. EIA MECS data likely capture more nonintegrated and recycle facilities than are represented in the AF&PA data set. Nonintegrated and recycle mills almost exclusively purchase electricity to meet facility electricity demand because they generate very little on-site electricity, which may be a contributing factor to the difference in net purchased electricity between the two data sets.

**Figure S22.** Purchased Electricity GHG Emission Intensity Changes Over Time from AF&PA Data and EIA MECS Data [Note: Purchased steam not included]

*Greening of the Electricity Grid*

The GHG emission intensity associated with purchased electricity has been decreasing due to several factors, such as proliferation of state renewable portfolio standards, state and federal environmental regulations, and market forces. Since 1996, US EPA has maintained the Emissions & Generation Resource Integrated Database (eGRID), a comprehensive database on the environmental characteristics of almost all electric power generated in the US 13. Figure S23 shows the decrease in US national average purchased electricity emission factors, from eGRID time series information. Since 2005, there has been a 38% reduction in the national average purchased electricity GHG emission factor.

**Figure S23.** Purchased Electricity GHG Emission Factors 13

*Energy Intensity Improvements*

The overall energy intensity of the US pulp and paper sector has decreased over time as mills have implemented energy efficiency improvements and installed more energy-efficient equipment. Figure S9 shows total fenceline energy intensity over time divided between fossil fuels, net purchased electricity and steam, and biomass and other renewables. Fenceline energy needs from biomass have remained essentially constant, but the share of fossil fuel, net purchased electricity, and steam has decreased over time.

*Production Reductions*

As highlighted in the discussion of direct emissions earlier in this report, shuttered production over time in the US has tended to be associated with older, less energy-efficient facilities, and closure of these facilities has led to overall improvements in both energy intensity and GHG intensity in the industry.

## **Wood Products Mills**

Data on electricity purchases by wood products mills were obtained from EIA MECS 15. Purchases by primary wood products producers were calculated as the sum of purchases by NAICS 321113 (sawmills), 3212 (veneer, plywood, and engineered wood products), and 3219 (other wood products). Emission factors for purchased electricity were the same as those used for the pulp and paper sector. Purchased steam was not included because wood products mills seldom purchase steam and because EIA MECS does not provide data for purchased steam. The changeover to NAICS codes in 1997 makes it difficult to interpret wood products subsector data for these years, so only the sector totals are used. These totals may include some converting operations. As a result, there is no residual (i.e., the difference between the sector total and the sum of subsectors) to assign to converting for 1991 and 1994. For these years, converting emissions are included with primary wood products manufacturing emissions.

The results, shown in Figure S24 with the sector’s production data 20, indicate that until approximately 2014 purchased electricity-related emissions were closely related to production. From 2014 forward, however, the effects of reductions in the GHG intensity of the grid (shown in Figure S23) far outweighed the effects of increased production, resulting in significant reductions in emissions even while production was increasing. The emissions and reduction estimates for 1990 (based on EIA MECS 1991 data), 2005 (based on EIA MECS 2006 data), and 2020 (based on EIA MECS 2018 data) are shown in Table S16. Emissions associated with gross purchased electricity in 2020 were 43% lower than in 2005 and 27% lower than in 1990. Reductions in emissions associated with net electricity, shown in Table S17, are similar.

**Figure S24.** Wood Products Production and Purchased Electricity-Related Emissions

**Table S16.** Emissions Associated with Gross Electricity Purchases by the US Wood Products Sector (NAICS 321113, 3212, and 3219)

| Year | Million Metric Tons CO2e per Year | Fraction of 1990  (MECS 1991) | Fraction of 2005  (MECS 2006) |
| --- | --- | --- | --- |
| 1990 (EIA MECS 1991) | 12.6 | 1.00 |  |
| 2005 (EIA MECS 2006) | 16.2 | 1.28 | 1.00 |
| 2020 (EIA MECS 2018) | 9.2 | 0.73 | 0.57 |

**Table S17.** Emissions Associated with Net Electricity Consumption by the US Wood Products Sector (NAICS 321113, 3212, and 3219)

| Year | Million Metric Tons CO2e per Year | Fraction of 1990  (MECS 1991) | Fraction of 2005  (MECS 2006) |
| --- | --- | --- | --- |
| 1990 (EIA MECS 1991) | 11.8 | 1.00 |  |
| 2005 (EIA MECS 2006) | 15.8 | 1.34 | 1.00 |
| 2020 (EIA MECS 2018) | 8.9 | 0.76 | 0.56 |

## **Converting Operations**

Scope 2 emissions for converting operations were estimated using essentially the same approach as used for direct fuel combustion-related emissions (described previously). It is assumed that for converting operations, gross and net electricity purchases are equal; therefore, results are shown for gross purchases only.

The components of paper and paperboard converting emissions associated with gross purchased electricity are shown in Figure S25 and the estimates for 1990 (EIA MECS 1991), 2005 (EIA MECS 2006), and 2020 (EIA MECS 2018) are shown in Table S18. In 2020, these emissions were approximately 45% lower than in 1990 and 2005.

**Figure S25.** Components of US Paper and Paperboard Converting Emissions Associated with Gross Purchased Electricity

**Table S18.** Emissions Associated with Gross Electricity Purchased by US Converting Operations in the Pulp, Paper, and Paperboard Value Chain

| Year | Million Metric Tons CO2e per Year | Fraction of 1990 | Fraction of 2005 |
| --- | --- | --- | --- |
| 1990 (EIA MECS 1991) | 18.1 | 1.00 |  |
| 2005 (EIA MECS 2006) | 17.9 | 0.99 | 1.00 |
| 2020 (EIA MECS 2018) | 9.8 | 0.54 | 0.55 |

The components of purchased electricity-related emissions for wood products converting are shown in Figure S26 and the estimates for 1990 (EIA MECS 1991), 2005 (EIA MECS 2006), and 2020 (EIA MECS 2018) are shown in Table S19. Again, the residual contribution attributed to converting emissions, calculated as the difference between the NAICS 321 total and the sum of the subcategories, is highly variable because it is a small difference between two large numbers. The changeover to NAICS codes in 1997 makes it difficult to interpret the wood products subsector data for 1991 and 1994; therefore, only the sector totals are used. This results in zero emissions residual to be assigned to converting for these years. These emissions are accounted for, however, as indirect emissions from primary wood product manufacturing. The sources and methods for estimating contributions to purchased electricity-related emissions from furniture and home construction are the same as discussed earlier to estimate fuel combustion-related emissions. It should be noted that the source of the estimate for energy consumption in building construction does not specify the amounts of electricity used. It states only that “construction energy used only diesel fuel and accounted for 3–5% on the nonrenewable fuel use…”24 For this profile, it is assumed that this figure can be applied to estimate electricity use, likely a conservative assumption that overstates electricity requirements in building construction.

**Figure S26.** Components of Emissions Associated with Gross Purchased of Electricity by US Wood Product Converting Operations

**Table S19.** Emissions Associated with Gross Purchases of Electricity by Converting Operations in the US Wood Products Value Chain

| Year | Million Metric Tons CO2e per Year | Fraction of 1990 | Fraction of 2005 |
| --- | --- | --- | --- |
| 1990 (EIA MECS 1991) | 1.0 | 1.00 |  |
| 2005 (EIA MECS 2006) | 1.8 | 1.72 | 1.00 |
| 2020 (EIA MECS 2018) | 0.9 | 0.87 | 0.51 |

Summing converting emissions for the paper sector and wood products sector results in the totals for converting shown in Figure S27 and Table S20. On average, 93% (ranging from 91 to 95%) of the converting emissions associated with purchased electricity are in the pulp and paperboard sector.

**Figure S27.** Emissions Associated with Gross Electricity Purchases at US Forest Products Industry Converting Operations

**Table S20.** Reductions in Emissions Associated with Gross Electricity Purchases at Converting Operations in the US Forest Products Industry

| Year | Million Metric Tons CO2e per year | Fraction of 1990 | Fraction of 2005 |
| --- | --- | --- | --- |
| 1990 (EIA MECS 1991) | 19.1 | 1.00 |  |
| 2005 (EIA MECS 2006) | 19.7 | 1.03 | 1.00 |
| 2020 (EIA MECS 2018) | 10.7 | 0.56 | 0.54 |

## **Total Forest Products Industry**

The indirect emissions associated with gross electricity and steam purchases by the US forest products industry are shown in Figure S28. In 2020, the pulp, paper, and paperboard sector accounted for 45% of these emissions. Wood products accounted for 25%. The converting sector accounted for 30%, almost all of which was associated with converting paper and paperboard.

**Figure S28.** Scope 2 Emissions from the US Forest Products Industry in 1990, 2005, and 2020

Reductions over time are quantified in Table S21. These emissions have been reduced by 43% since 1990 and 47% since 2005. Much of the reduction has been driven by reductions in the GHG intensity of purchased electricity which, in 2020, was 38% lower than in 2005.

**Table S21.** Scope 2 Emissions Associated with Gross Electricity and Steam Purchases by the US Forest Products Industry

| Year | Million Metric Tons CO2e | | | | | | |
| --- | --- | --- | --- | --- | --- | --- | --- |
| Pulp, Paper, and Paperboard | Wood Products | Converting – Paper | Converting – Wood Products | Total | Fraction of 1990 | Fraction of 2005 |
| 1990 | 32.3 | 12.6 | 18.1 | 1.0 | 64.0 | 1.00 |  |
| 2005 | 33.0 | 16.2 | 17.9 | 1.8 | 68.8 | 1.08 | 1.00 |
| 2020 | 16.5 | 9.2 | 9.8 | 0.9 | 36.4 | 0.57 | 0.53 |

# **SCOPE 3 INDIRECT EMISSIONS ASSOCIATED WITH PURCHASED ELECTRICITY AND STEAM**

Emissions in 1990, 2005, and 2020 associated with upstream processes involved in producing purchased electricity were estimated using data from the National Renewable Energy Laboratory (NREL) on the ongoing upstream GHG emissions attributable to different types of power 27 and information on the composition of the grid, as reported by eGRID 13

Although the NREL fact sheet 27 suggests that its factors include transport emissions, the underlying literature source 28 indicates that transport is not included in the factors. That source also indicates that where transport is included, it typically adds 3 to 5% to life cycle coal-based electricity emissions.28 The NREL fact sheet indicates that these life cycle emissions are about 1,000 gmCO2e/kWh, and therefore, the factor used for coal and oil in the NREL study was increased by 40 gmCO2e/kWh (i.e., from 10 to 50 gCmO2e/kWh). Emissions in 1990 were estimated using eGRID data for 1996, the earliest data in eGRID. The NREL fact sheet does not include a factor for biomass, thus the effects of biomass were investigated by varying the factor for biomass from zero up to the value for coal. This range did not impact the overall Scope 3 factor within two significant figures. The Scope 3 factors from NREL are shown in Table S22, while the composition of the grid is shown in Table S23. The resulting Scope 3 factors based on the composition of the grid are shown in Table S24.

**Table S22.** Ongoing Scope 3 Emissions Associated with Producing Electricity27

| Type of Generation | Ongoing Upstream Emissions, gm CO2e/kwh |
| --- | --- |
| Natural gas | 71 |
| Coal | 10 + 40 = 50 |
| Nuclear | 12 |
| Hydro | 1.9 |
| Wind | 0.74 |
| Solar | 0.74 |
| Geothermal | 6.9 |
| Oil | No value; therefore, assumed same as coal |

**Table S23.** Composition of Supply to the US Electricity Grid13

| Type of Generation | Composition of Supply to US Grid | | |
| --- | --- | --- | --- |
| 1996a | 2005 | 2020 |
| Coal | 52.5% | 49.6% | 19.3% |
| Natural gas | 12.3% | 18.8% | 40.5% |
| Oil | 4.5% | 3.5% | 0.9% |
| Hydro | 9.6% | 6.7% | 7.1% |
| Nuclear | 19.0% | 19.3% | 19.7% |
| Wind | 0.1% | 0.4% | 8.4% |
| Biomass | 1.5% | 1.3% | 1.4% |
| Geothermal | 0.5% | 0.4% | 0.4% |
| Solar | 0.0% | 0.0% | 2.2% |
| a 1996 data are the earliest available in eGRID and were used for 1990. | | | |

**Table S24.** Scope 3 Emission Factors for Purchased Electricity

| Year | Kg CO2e per Purchased MWh  US Average | Ratio of Upstream Emission Factor to Combustion Emission Factor |
| --- | --- | --- |
| 1990 | 38 | 0.058 |
| 2005 | 41 | 0.068 |
| 2020 | 41 | 0.110 |

# **FACTORS FOR PRODUCING NON-FIBER NON-FUEL INPUTS**

The factors used to account for upstream emissions attributable to non-fiber, non-fuel inputs to manufacturing are shown in Table S25.

**Table S25**. Upstream Emission Factors for Non-Fiber, Non-Fuel Inputs29

| Product Type | FICAT Emission Factor for Non-fiber, Non-fuel Materials used in Manufacturing29  (kg CO2e/Metric Ton Product) |
| --- | --- |
| Paper, Paperboard, and Market Pulp |  |
| Newsprint | 75 |
| Coated freesheet | 300 |
| Coated mechanical | 200 |
| Uncoated mechanical | 60 |
| Uncoated freesheet | 100 |
| Packaging and special industrial | 20 |
| Linerboard – Virgin | 20 |
| Linerboard – Recycled | 20 |
| Semi-Chem Medium | 30 |
| Medium – Recycled | 40 |
| Solid bleached paperboard | 40 |
| Recycled and other board | 200 |
| Tissue | 50 |
| Market pulp | 200 |
| Wood Products |  |
| Creosote-treated wood | 700 |
| Untreated lumber | 0 |
| Other preservative-treated lumber | 50 |
| Panels, veneer, and misc. products | 200 |

# **EMISSIONS FROM SYSTEMS MANAGING FOREST PRODUCT INDUSTRY WASTES**

## **Emissions from Landfills Receiving Pulp and Paper Mill Wastes**

Methane emissions are estimated for four different wastes that may be disposed of in mill landfills: wastewater treatment residuals (WWTR), boiler ash, recovery area wastes, and other wastes. In earlier profiles, only WWTR were considered, but US EPA’s GHGRP10 includes calculation parameters for all four types of wastes. Therefore, all are included here. In addition, the GHGRP includes parameter values for combined wastes from pulp and paper mills, thus separate estimates are presented assuming that all landfilled wastes are co-disposed.

*Pulp and Paper Mill Wastewater Treatment Residuals (WWTR)*

There are three methods for estimating methane emissions from landfills receiving WWTR from pulp and paper mills:

1. Adapt estimates developed by US EPA for its annual inventory12;
2. Extrapolate emissions reported by facilities under US EPA’s GHGRP10;
3. Use the same approach as used in the GHGRP but incorporate updated data and parameters.

*Pulp and Paper Mill WWTR Estimates Based on US EPA’s Annual Inventory*

US EPA develops estimates of methane emissions from landfills in the pulp/paper and food/beverage sectors12. US EPA states that it used a factor of 0.05 metric tons of landfilled waste per metric ton of pulp and paper production to estimate annual disposal amounts and presents estimates of total waste generation and waste landfilled12. There appear to be inconsistencies in EPA’s estimates, however. Table A-219 in the annexes to US EPA’s 1990–2020 inventory 12 indicates that the pulp and paper sector produced 121 million metric tons of waste in 2020. Using a factor of 0.05 would suggest that pulp and paper production equaled 2.4 billion metric tons, which is more than an order of magnitude too large. The table, however, also shows US EPA’s estimate of the metric tons landfilled, which in 2020 equaled 5.9 million metric tons (assumed wet). This is much higher than NCASI estimates (see discussion later in this section) but far more reasonable, given industry production and other estimates.

Degradation was modeled by EPA using a first order decay model with a value for k of 0.06 yr-1 and degradable organic carbon (DOC) of 0.15 (Lo of 49 m3 methane/metric ton waste), wet basis. A comparable approach, using different parameter values, was used for the food/beverage sector. US EPA does not show the emissions results separately for the two sectors, but the amounts of waste disposed are shown separately. For this report, we have estimated the pulp and paper sector’s contribution to these emissions by multiplying the total emissions from the two sectors by the ratio of pulp and paper waste amounts to total waste amounts from the two sectors. Values from 2005 to 2026 were interpolated. The results are shown in Table S26. Using this approach, US EPA’s annual inventory calculations suggest that methane emissions attributable to WWTR increased from 289,000 metric tons in 1990 to 363,000 metric tons in 2009 before declining to 355,000 metric tons in 2020.

**Table S26**. Adaptation of US EPA Annual Inventory Calculations to Estimate Methane Emissions Attributable to WWTR in Landfills

| Year | Emissions from the Pulp-Paper and Beverage-Food Sectors Combined,  Metric Tons Methane | Fraction of Waste from the Pulp-Paper Sector | Estimated Emissions from the Pulp and Paper Sector, Metric Tons Methane |
| --- | --- | --- | --- |
| 1990 | 436,000 | 0.67 | 289,000 |
| 2005 | 574,000 | 0.63 | 363,000 |
| 2020 | 674,000 | 0.53 | 355,000 |

*Pulp and Paper Mill WWTR Estimates Based on the Greenhouse Gas Reporting Program*

Since 2011, many pulp and paper facilities have been required to report annual GHG emissions to US EPA under the GHGRP10. In reporting year 2021, 103 pulp and paper facilities reported to the program, 90 of which reported emissions for industrial landfills (based on the FLIGHT tool available from USEPA10). The calculations involve the same first order decay approach described earlier. USEPA publishes default values for the parameters needed with this approach to calculate annual emissions from current and past discards of waste in landfills.

The annual emissions reported under the GHGRP for landfill emissions at pulp and paper mills (NAICS codes 322110, 322121, 322122, and 322130) are shown in Table S27. These are approximately one-half of those estimated in the national inventory shown in Table S26. In addition to the quantity of emissions being different, the decline in emissions from 2011 to 2020 is also much larger than indicated by the US EPA national inventory calculations shown in Table S26. The differences in emissions estimates are examined in more detail later in this report.

**Table S27**. Methane Emissions from Pulp and Paper Mill Landfills Reported in 2020 Under the GHGRP

| Year | Metric Tons Methane |  | Year | Metric Tons Methane |
| --- | --- | --- | --- | --- |
| 2011 | 232,000 |  | 2017 | 172,000 |
| 2012 | 224,000 |  | 2018 | 168,000 |
| 2013 | 204,000 |  | 2019 | 168,000 |
| 2014 | 200,000 |  | 2020 | 164,000 |
| 2015 | 200,000 |  | 2021 | 160,000 |
| 2016 | 188,000 |  |  |  |

*Pulp and Paper Mill WWTR Estimates Based on GHGRP First Order Decay Model*

This modeling approach is the same as that published by IPCC for national inventories7 and that used by US EPA for estimating industrial landfill emissions in its national inventories12 and in the US EPA’s GHGRP10.

NCASI has data allowing estimates of WWTR generation rates per metric ton of production back to 1990. This is the starting date used in the GHGRP for landfill methane calculations. These have been multiplied by the corresponding industry production to estimate annual quantities of the residuals, as called for in the GHGRP. Survey data are also available indicating the fraction of residuals that are landfilled. The sources of this information are described herein. The fraction of WWTR being landfilled has declined from over 80% in the 1970s to under 40% in 2020. The balance of WWTR is used beneficially, for instance, as soil amendment or as a source of energy. In this profile, only landfill emissions are estimated because the other management methods produce far fewer GHGs.

US EPA’s GHGRP and US EPA’s annual inventory calculations do not use the same default DOC and k values for WWTR. The values used in the two programs are shown in Table S28.

The amounts of WWTR generated and landfilled were estimated from NCASI survey data to construct a series of annual values starting in 1960 and ending in 2020. This period was used as it is the period used in the GHGRP. For the period before 1988, mean generation rates reported in Miner and Unwin30 were used. Data for subsequent years were from periodic industry surveys. The five estimates from these sources ranged from 40.5 kg per metric ton in 1975 to 47.55 kg per metric ton in 2016. The average of the values, 44 dry kg per metric ton of production, was used to reflect all years. The information from these sources is in dry weight, but the DOC values used by US EPA are on a wet waste basis. Therefore, the generation rates were converted to a wet basis using a solids content of 31%. This value represents the facility-weighted average reported in Table 3.1 of NCASI (2019)31. To derive this average, the number of mills with each type of waste and dewatering device was multiplied by the percent solids for that combination. The total was summed and divided by the number of mills. Dryers were not included. Generation rates were multiplied by annual production of paper, paperboard, and market pulp to derive estimates of metric tons of WWTR each year from 1960 to 2020.

**Table S28**. Pulp and Paper Mill Wastewater Treatment Residual Parameter Values for First Order Decay Model

| Parameter | Definitions  (Units) | GHGRP Subpart TT10 | US EPA 2020 GHG Inventory Annexes12,  p. A-455 |
| --- | --- | --- | --- |
| DOC | Degradable Organic Carbon  (kg organic C/kg wet waste) | 0.12 | 0.15 |
| DOCf | Fraction of DOC that will degrade in landfill  (Unitless) | 0.5 (equivalent to a Lo of 59.7 m3 methane per wet metric ton waste) | 0.328 (calculated from Lo of 49 m3 methane per wet metric ton waste) |
| k | First Order Decay Rate  (yr-1) | 0.02 (dry climate)  0.04 (moderate climate)  0.06 (wet climate) | 0.06 |
| MCF | Fraction of degradable carbon that is subject to anaerobic conditions  (Unitless) | 1 | 1 |
| F | Fraction by volume of CH4 in landfill gas, as generated | 0.5 | 0.5 |
| OX | Fraction of CH4 that is oxidized before it is released to the atmosphere  (Unitless) | 0.1 (values ranging from 0.0 to 0.35 are listed with the choice depending on site-specific circumstances) | 0.1 |

The fraction of wastewater treatment plant residuals that is landfilled has changed significantly over time. Data from the sources discussed previously indicate that the fraction landfilled was 86%, 70%, 51%, and 36% in 1979, 1988, 1995, and 2016, respectively 30–32. To estimate the annual amounts of landfilled residuals, the 1979 value (86%) was used for 1960 to 1979, the 2016 value (36%) was used for 2016 to 2020, and the values for 1980 to 2017 were interpolated using the 1979, 1988, 1995, and 2016 data points. Methane releases for each year from 1990 were estimated using the calculation approach in Subpart TT of the GHGRP10. The moderate climate value for k was used. For comparison, the parameter values used in US EPA’s inventory calculations were also used. The results are shown in Table S29.

**Table S29**. Methane Releases Attributed to Landfilling Pulp and Paper Mill WWTR Calculated Using the First Order Decay Model with Different Sets of US EPA Defaults (see Table S28)

| Year | Methane Emissions, Metric Tons | |
| --- | --- | --- |
| First Order Decay Model Using GHGRP Subpart TT Parameter Values (US EPA 2023a)a | First Order Decay Model Using US EPA GHG Inventory Parameter Values (US EPA 2022b) |
| 1990 | 175,000 | 179,000 |
| 1995 | 190,000 | 188,000 |
| 2000 | 199,000 | 192,000 |
| 2005 | 202,000 | 189,000 |
| 2010 | 200,000 | 181,000 |
| 2015 | 194,000 | 170,000 |
| 2020 | 186,000 | 158,000 |
| a Elsewhere in this report, where a single estimate is required, this approach is used to provide the estimate. | | |

*Pulp and Paper Mill WWTR Estimates: Comparison of Approaches*

The results of the approaches described earlier are compared in Figure S29. There are large differences between some of the estimates, the reasons for which are explored herein.

Data from the GHGRP are available only since 2011. Over the 2011 to 2020 period, they are similar to NCASI’s estimates but suggest much more rapid reductions. There are several factors to consider in interpreting these data.

The companies reporting under the GHGRP are not required to use default values for k, DOC, DOCf, or OX if they have more appropriate values. Indeed, examination of several GHGRP reports confirms that mills are not always using default values but rather values the companies find more appropriate. It is unsurprising, therefore, that the sum of these reports would not be the same as an industry estimate based on default values.

It is also important to consider that the GHGRP only includes materials placed in landfills owned by the reporting company. Landfills owned by third parties are not included in the reports from pulp and paper mills and are not easily identified in the GHGRP data. The three other approaches shown in Figure S23 are intended to include all landfills, regardless of ownership.

**Figure S29.** Methane Emissions Attributable to Landfilling Pulp and Paper Mill WWTR: A Comparison of Methods

Another important consideration in interpreting GHGRP data is the approach used to estimate historical deposits into landfills. Most mills reporting under the GHGRP do not have data dating to 1960 (the starting year for GHGRP calculations) and, therefore, have had to use GHGRP-designated methods to estimate many prior years of landfill deposits. Examination of several mill reports suggests that the GHGRP methods can yield estimates for previous years that are larger than current deposits, sometimes by a significant amount. This may be producing overestimates of emissions in the earlier years of the reporting program, which would increase apparent reductions in emissions since the reporting began. For all these reasons, GHGRP reporting data on landfill methane emissions are not used in this profile for estimating these emissions.

Estimates produced by allocating industrial landfill emissions reported in US EPA’s annual inventories are consistently much higher than those in the GHGRP as well as those estimated by NCASI when using the same parameter values as US EPA uses in GHG inventory calculations. Some of the difference is likely related to differences in estimates of the amounts of WWTR landfilled over time. US EPA’s estimates are based on wet weight whereas NCASI uses dry weight. Therefore, a comparison of waste quantities requires knowing the solids content of the waste being landfilled. Based on survey data described earlier in this report, NCASI has used 31% solids for WWTR in its calculations. The data in Figure S30 are shown for US EPA estimates of landfilled quantities if WWTR are at 30%, 40%, and 50% solids. The figure shows that even at 30% solids, NCASI’s data indicate lower quantities in landfills since 2005. At higher solids contents, the difference becomes larger. In addition, the figure shows that while NCASI data indicate large reductions in amounts landfilled over time, US EPA’s estimates have remained relatively constant. These differences would contribute to NCASI-modeled estimates of methane emissions being lower than those shown in US EPA’s inventory, especially in recent inventory years.

Another difference is that for its national inventory, US EPA begins the calculations in 1940 instead of 1960. NCASI has extended its calculations back to 1940 by lowering landfilled quantities according to changes in real gross domestic product, the method used by US EPA. Using this approach, starting in 1940 increases 1990 emissions by only about 5%, with the difference decreasing over time, leading to only a 1% difference in 2020. Thus, this difference does not explain the disparity between NCASI’s and US EPA’s estimates.

Even if all industrial waste identified in US EPA’s calculations is assigned to the pulp and paper industry, NCASI’s estimates, using US EPA methods and parameter values, remain 20 to 25% below those published by US EPA for methane from all industrial landfills. The reasons for the differences between NCASI’s and US EPA’s estimates, therefore, remain unclear.

**Figure S30**. WWTR Quantities Landfilled Estimated by US EPA and Estimated in this Report by NCASI

The 2020 reductions from 1990 and 2005 derived from these different calculation approaches are shown in Table S30. NCASI’s modeling using GHGRP defaults for moderate climate (used in this study as a base case when a single estimate is required) indicates that 2020 methane emissions attributable to landfill disposal of WWTR were 6% higher than 1990 emissions and 8% lower than 2005 values.

**Table S30**. Methane Emissions in 2020 Attributable to WWTR and Change Since 1990

| Estimation Method | 2020 Emissions, Metric Ton Methane | 2020 as Fraction of 1990 | 2020 as  Fraction of 2005 |
| --- | --- | --- | --- |
| Allocate industrial landfill emissions in US EPA’s 2020 inventory report (1991 values used for 1990) | 355,000 | 1.23 | 0.98 |
| This study: modeling using the same parameter values as used in US EPA’s 2020 inventory calculations (DOC = 0.15, DOCf = 0.328, k = 0.06) | 158,000 | 0.88 | 0.84 |
| This study: modeling using the same parameter values as used in the GHGRP program (moderate climate) (DOC = 0.12, DOCf = 0.5, k = 0.04)a | 186,000 | 1.06 | 0.92 |
| a In this report, when a single estimate is required, these are the results used. | | | |

*Pulp and Paper Mill Boiler Ash Estimates*

Information on the quantities of ash produced by pulp and paper mills has only been collected by NCASI since the mid-1990s33. These survey data indicate that from the mid-1990s until approximately 2010, ash generation rates remained relatively constant, averaging 56.55 kg per metric ton. Starting in approximately 2010, however, ash production began dropping significantly so that in 2020 the generation rate was 25.3 kg per metric ton. This trend is primarily the result of industry’s reduced reliance on coal for energy. The US Department of Energy (DOE) MECS survey, for instance, indicates that the pulp and paper industry (NAICS 322) reduced coal consumption from 8 million metric tons in 2010 to 2.7 million metric tons in 201815.

For this study, it was assumed that from 1960 until 2010, ash was produced at a rate of 56.55 kg per metric and from then until 2020, the rate declined according to NCASI’s semiannual survey data until it reached 25.3 kg per metric ton in 2020. NCASI published information indicates that the fraction landfilled was 84%, 72%, and 75% in 1988, 1995, and 2016, respectively 31,32,34. Based on the survey data, however, it is impossible to know the extent to which these values include ash that is comingled with WWTR. For the calculations here, it is assumed that ash is managed separately from WWTR. To the extent this assumption is incorrect, it would result in double counting emissions from ash, making it a conservative approach. The landfilling rates between 1988 and 2016 were interpolated. The value for 1988 was extended back to 1960, while the 2016 value was extended forward to 2020. Generation rates were multiplied by annual production of paper, paperboard, and market pulp17,19 to derive estimates of metric tons of ash each year from 1960 to 2020. The default parameter values used in the GHGRP to model methane emissions from boiler ash landfills are shown in Table S31.

**Table S31.** Pulp and Paper Mill Boiler Ash Parameter Values for First Order Decay Model

| Parameter | Units | GHGRP, Subpart TT10 |
| --- | --- | --- |
| DOC | kg organic C/kg wet waste | 0.06 |
| DOCf | Fraction of DOC that will degrade in landfill | 0.5 |
| k | yr-1 | 0.02 (dry climate)  0.03 (moderate climate)  0.04 (wet climate) |
| MCF | Fraction of degradable carbon that is subject to anaerobic conditions | 1 |
| F | Fraction by volume of CH4 in landfill gas, as generated | 0.5 |
| OX | Fraction of CH4 that is oxidized before it is released to the atmosphere | 0.1 (values ranging from 0.0 to 0.35 are listed with the choice depending on site-specific circumstances) |

The DOC values in the GHGRP Subpart TT rules are on a wet weight basis. Generation rates, however, are on a dry weight basis, requiring a factor to convert to as-disposed wet weight. Data are not available on the solids content of boiler ash disposed in pulp and paper industry landfills. Ash management methods in 1995, however, have been documented by NCASI 32. NCASI collected 1995 data from 145 mills producing boiler ash. Forty-two of the mills indicated having a dewatering method for ash. Most of these were gravity drainage systems, such as drainage pads and settling ponds. Six respondents reported using mechanical dewatering devices. This information was used to infer that 71% (i.e., 103/145) of ash was handled and disposed of in a 100% dry state, 25% (i.e., 36/145) was dewatered using gravity systems like settling ponds, and 4% (i.e., 6/145) was dewatered mechanically. For this analysis, mechanical dewatering is assumed to produce a dewatered product at 90% solids (wet weight basis). A solids content of 60% (wet basis) was used to represent a reasonable value for dredged ash as landfilled, representing the remaining wet ash 35. The weighted average solids content of ash disposed by the industry is therefore calculated to be 90% (wet basis) in 1995. The survey was repeated in 2016 31, but the results on ash management were not published. Using the same approach, however, the unpublished data for 2016 yield a weighted average solids content of disposed ash of 98%. The higher solids content reflects reduced reliance on wet scrubbing systems for particulate control on power boilers. For these calculations, it was assumed that in 1960 all ash was dewatered in ponds to 60%. The solids content used to convert the GHGRP wet basis DOC to a dry basis started at 60% in 1960, increased linearly to 90% in 1995, and again increased linearly to 98% in 2016, where it is estimated to have remained.

Using these values in the landfill model with GHGRP parameter defaults for DOC (wet basis) and k yields the results shown in Table S32.

**Table S32.** Methane Emissions from Boiler Ash Landfilled at Pulp, Paper, and Paperboard Mills

| Year | NCASI Calculations Using GHGRP Equations – GHGRP Default DOC and k (Moderate Climate) | | Fraction of 1990 value | Fraction of 2005 value |
| --- | --- | --- | --- | --- |
| Metric Tons CH4 | Million Metric Tons CO2ea |
| 1990 | 40,300 | 1.0 | 1.00 |  |
| 1995 | 45,300 | 1.1 | 1.12 |  |
| 2000 | 49,800 | 1.2 | 1.24 |  |
| 2005 | 53,200 | 1.3 | 1.32 | 1.00 |
| 2010 | 55,600 | 1.4 | 1.38 | 1.05 |
| 2015 | 55,700 | 1.4 | 1.38 | 1.05 |
| 2020 | 52,700 | 1.3 | 1.31 | 0.99 |
| a GWP of 25. | | | | |

*Pulp and Paper Mill Recovery Area Waste Estimates*

NCASI survey data allow estimates of the quantities of solid wastes, other than WWTR and ash,at several points back to 1995 33. In addition, NCASI 1999 32 and NCASI 2019 31 indicate that recovery area wastes represented 29% and 34% of these “other” wastes in 1995 and 2016, respectively. Using these two data sets, NCASI estimates that from 1960 to 1995, the industry generated about 21.05 kg per metric ton of recovery area wastes. This decreased to 14.25 kg per metric ton in 2002 and then varied between 14 and 16 kg per metric ton until 2016. From 2016 to 2020, generation rates increased from 16.3 to 18.35 kg per metric ton. Dry weight was converted to wet weight using a solids content of 65%, the average reported for these materials in NCASI 2019 31. A weighted average percent landfilled of 87.9% for dregs, lime mud, and slaker grit was developed from data in NCASI 1999 32. This was the only data point available; therefore, it was used for the entire period of 1960 to 2020. The parameter values used to model methane attributable to landfilled recovery area wastes are shown in Table S33.

**Table S33**. Pulp and Paper Mill Recovery Area Waste Parameter Values for First Order Decay Model

| Parameter | Units | GHGRP, Subpart TT10 |
| --- | --- | --- |
| DOC | kg organic C/kg wet waste | 0.025 |
| DOCf | Fraction of DOC that will degrade in landfill | 0.5 |
| k | yr-1 | 0.02 (dry climate)  0.03 (moderate climate)  0.04 (wet climate) |
| MCF | Fraction of degradable carbon that is subject to anaerobic conditions | 1 |
| F | Fraction by volume of CH4 in landfill gas, as generated | 0.5 |
| OX | Fraction of CH4 that is oxidized before it is released to the atmosphere | 0.1 (values ranging from 0.0 to 0.35 are listed with the choice depending on site-specific circumstances) |

The results are shown in Table S34. These estimates indicate that the amounts of methane attributable to recovery area wastes are far lower than those attributable to other wastes.

**Table S34**. Methane Emissions Attributable to Landfilled Recovery Area Wastes from Pulp and Paper Mills

| Year | Metric Tons Methane Emitted –  NCASI Calculations Using GHGRP Equations – GHGRP Default DOC and k (Moderate Climate) | Fraction of 1990 value | Fraction of 2005 value |
| --- | --- | --- | --- |
| 1990 | 7,700 | 1.00 |  |
| 2005 | 10,800 | 1.41 | 1.00 |
| 2020 | 11,800 | 1.53 | 1.09 |

*Estimates for Other Waste from Pulp and Paper Mills*

In addition to WWTR, ash, and recovery wastes, many mills dispose of other materials in landfills. These other materials can include wood yard waste, pulp mill and paper mill rejects, and miscellaneous refuse. The types and quantities vary among mills, as do the methods used for disposal. The amounts of other waste were derived using the same set of data as described for recovery area wastes, using the assumption that all “other waste” reported in NCASI surveys that is not from the recovery area could be considered “other pulp and paper wastes” as described in GHGRP rules (US EPA 202310, Subpart TT Table TT-1). For years up to 1995, this resulted in a value of 51.5 dry kg per metric ton. This declined to 29.5 to 31 kg per metric ton between 2004 and 2015, when it began increasing, reaching 35.5 kg per metric ton in 2020. Dry weights were converted to wet weights using a solids content of 53%, derived from Table 3.3 of NCASI 201931. This is the simple average of the reported values for virgin fiber pulping rejects, secondary fiber pulping rejects (deinking and other), uncombusted woodyard residuals, process water treatment solid residuals, and general mill refuse. The fraction landfilled (0.342) was derived from data in Figure 11 and Table 8 in NCASI 1999a32 for nonrecovery area wastes. The model parameter values used to estimate landfill methane emissions attributable to these other solid wastes are shown in Table S35. The estimated emissions are shown in Table S36.

**Table S35**. Pulp and Paper Mill “Other” Waste Parameter Values for First Order Decay Model

| Parameter | Units | GHGRP, Subpart TT10 |
| --- | --- | --- |
| DOC | kg organic C/kg wet waste | 0.2 |
| DOCf | Fraction of DOC that will degrade in landfill | 0.5 |
| k | yr-1 | 0.02 (dry climate)  0.03 (moderate climate)  0.04 (wet climate) |
| MCF | Fraction of degradable carbon that is subject to anaerobic conditions | 1 |
| F | Fraction by volume of CH4 in landfill gas, as generated | 0.5 |
| OX | Fraction of CH4 that is oxidized before it is released to the atmosphere | 0.1 (values ranging from 0.0 to 0.35 are listed with the choice depending on site-specific circumstances) |

**Table S36**. Methane Emissions Attributable to Landfilled “Other” Wastes from Pulp and Paper Mills

| Year | Metric Tons Methane Emitted –  NCASI Calculations Using GHGRP Equations – GHGRP Default DOC and k (Moderate Climate) | Fraction of 1990 value | Fraction of 2005 value |
| --- | --- | --- | --- |
| 1990 | 71,800 | 1.00 |  |
| 2005 | 98,800 | 1.38 | 1.00 |
| 2020 | 100,300 | 1.40 | 1.01 |

*Estimates Assuming All Landfilled Waste, Except WWTR, is Combined*

US EPA’s GHGRP includes parameter values for pulp and paper combined wastes, not including WWTR10. The methods used to estimate quantities of the individual materials are described earlier in this report. These were summed (not including WWTR) to perform calculations using this additional category in the GHGRP. The parameter values are shown in Table S37 and the results in Table S38. When ash was assumed to be landfilled at 60% solids, the weighted average solids content for the combined wastes was also assumed to be at 60%.

The estimated emissions from assumed combined landfilling of ash, recovery area wastes, and “other” wastes are almost double those calculated when the three emissions are estimated separately, as shown in Table S39. An analysis of the calculations indicates that the difference is primarily due to the large difference between the DOC value for ash managed separately (DOC = 0.06) compared to the value applied if it is combined with other non-WWTR wastes (DOC = 0.15). As noted previously, most of the ash from the forest products industry is low in organic content and high in pH, suggesting that the amounts of methane produced from it would be low. Based on this, it is the authors’ judgment that the higher estimate of methane emissions associated with US EPA’s parameter values for combined wastes is less reliable than the lower value obtained by examining the wastes separately.

**Table S37**. First Order Decay Model Parameters for non-WWTR Combined Wastes

| Parameter | Units | GHGRP, Subpart TT10 |
| --- | --- | --- |
| DOC | kg organic C/kg wet waste | 0.15 |
| DOCf | Fraction of DOC that will degrade in landfill | 0.5 |
| k | yr-1 | 0.02 (dry climate)  0.03 (moderate climate)  0.04 (wet climate) |
| MCF | Fraction of degradable carbon that is subject to anaerobic conditions | 1 |
| F | Fraction by volume of CH4 in landfill gas, as generated | 0.5 |
| OX | Fraction of CH4 that is oxidized before it is released to the atmosphere | 0.1 (values ranging from 0.0 to 0.35 are listed with the choice depending on site-specific circumstances) |

**Table S38**. Methane Emissions for Non-WWTR Combined Wastes from Pulp and Paper Mills

| Year | Metric Tons Methane Emitted | Fraction of 1990 value | Fraction of 2005 value |
| --- | --- | --- | --- |
| NCASI Calculations Using GHGRP Equations – 60.1% Solids – GHGRP Default DOC and k (Moderate Climate) for Combined Wastes |  |  |
| 1990 | 226,000 | 1.00 |  |
| 1995 | 267,000 | 1.18 |  |
| 2000 | 301,000 | 1.34 |  |
| 2005 | 322,000 | 1.43 | 1.00 |
| 2010 | 337,000 | 1.49 | 1.05 |
| 2015 | 343,000 | 1.52 | 1.06 |
| 2020 | 337,000 | 1.49 | 1.05 |

**Table S39**. Comparison of Combined and Individual Landfilling of Non-WWTR Solid Wastes at Pulp and Paper Mills

| Year | Metric Tons Methane | |
| --- | --- | --- |
| Co-disposed, Not Including WWTR | Individually Disposed, Not Including WWTR |
| 1990 | 226,000 | 120,000 |
| 2005 | 322,000 | 163,000 |
| 2020 | 337,000 | 165,000 |

*Total Landfill Methane Emissions from Pulp and Paper Mill Wastes*

The earlier analysis yields estimates of methane emissions attributable to landfilled solid wastes from pulp and paper mills, shown in Table S40.

**Table S40**. Total Methane Emissions Attributable to Landfilled Solid Wastes from Pulp and Paper Mills

| Year | Metric Tons Methane Emissions | | | | | |
| --- | --- | --- | --- | --- | --- | --- |
| WWTR | Ash | Recovery Area | Other Wastes | Total of Individually Disposed Wastes | WWTR Emissions Plus Combined Non-WWTR Wastes, Co-disposed |
| 1990 | 175,000 | 40,000 | 7,700 | 72,000 | 295,000 | 401,000 |
| 2005 | 202,000 | 53,000 | 11,000 | 99,000 | 365,000 | 524,000 |
| 2020 | 186,000 | 53,000 | 12,000 | 100,000 | 350,000 | 523,000 |

The contributions of different wastes to these emissions in 2020 are shown in Figure S31. WWTR contributes most to emissions, at about 53% of the total. Boiler ash contributes 15% and other waste contributes 29%. Methane emissions attributable to recovery area wastes are only about 3%.

**Figure S31**. Contributions of Different Wastes to Pulp and Paper Mill 2020 Landfill Methane Emissions

Emissions in 2020 are compared to those in 1990 and 2005 in Table S41. Emissions in 2020 were 19% higher than 1990 emissions, based on the sum of individual waste estimates, and 4% below 2005 emissions. If non-WWTR wastes are modeled as co-disposed, 2005 and 2020 emissions have increased more than indicated in calculations that keep the wastes separate.

**Table S41.** 1990 to 2020 Change in Methane Emissions Attributable to Landfilled Solid Wastes from Pulp and Paper Mills

| Year | Fraction of 1990 Emissions | | Fraction of 2005 Emissions | |
| --- | --- | --- | --- | --- |
| Sum of Individual Wastes Separately Disposed | WWTR Emissions Plus Combined Disposal of All Other Wastes | Sum of Individual Wastes Separately Disposed | WWTR Emissions Plus Combined Disposal of All Other Wastes |
| 1990 | 1.00 | 1.00 |  |  |
| 2005 | 1.24 | 1.31 | 1.00 | 1.00 |
| 2020 | 1.19 | 1.30 | 0.96 | 1.00 |

## **Emissions from Wood Product Facility Landfills – Lumber Mills**

*Estimates for Lumber Mill Boiler Ash*

There are few survey data available on the amounts and types of solid waste from wood products mills. For this profile, NCASI calculated ash quantities based primarily on data on biomass energy consumption reported in EIA MECS surveys 15. Biomass energy consumption per unit of production was calculated using production data from FAOSTAT 20. An analysis of biomass energy consumption per unit of production over time did not reveal a statistically significant trend; therefore, the average biomass energy use per unit of production was used for all years (based on EIA MECS data from 1994 to 2018). The average was calculated to be 1.3 million BTU HHV (or 1370 MJ) per m3 of lumber. This was converted to fuel quantity using a factor of 17.48 million BTU HHV per short ton of biomass fuel 36. Ash production was calculated by multiplying biomass quantity by an ash content of 2% (value derived in Someshwar 1996 37). These factors resulted in a calculated ash generation rate of 1.35 dry kg per m3 of lumber. This value was used for all years. For the pulp and paper sector (discussed earlier in this section), NCASI relied on published information indicating that the fraction landfilled was 84%, 72%, and 75% in 1988, 1995, and 2016 respectively 31,32,34. Due to the lack of robust data for lumber mills, these pulp and paper mill data were used to describe the disposition of boiler ash. The landfilling rates between 1988 and 2016 were interpolated using these values. The value for 1988 was extended back to 1960, while the 2016 value was extended forward to 2020.

The DOC values in GHGRP Subpart TT rules 10 are on a wet weight basis. Generation rates, however, are on a dry basis, requiring a factor to convert them to as-disposed wet weight. Data are not available, however, on the solids content of boiler ash disposed of in wood product mill landfills. For pulp and paper mill ash disposal estimates, data were available, allowing solids content to be estimated over time. These data are not available for wood products mills, however. Therefore, the average solids content for pulp and paper mill ash disposal from 1990 to 2020, equal to 83%, was used. The current default DOC values for ash are most likely based on as-disposed solids content. This is evident because in December 2016, EPA created new categories of pulp and paper mill wastes with different DOC values under the GHGRP. The data used to derive these categories are reviewed in a 2015 memorandum from RTI International to US EPA38. The DOC data examined in that memorandum are those submitted by companies and are all on a wet basis. The default DOC values subsequently added to the GHGRP are based directly on these data and are therefore most appropriately applied at the solids content expected of the wastes tested by the reporting companies. Therefore, in this report, when using GHGRP default DOC values, we have applied them to waste materials at solids contents that, based on best judgment and data, are representative of what is disposed. The base case for this assessment, used when a single estimate is needed, is based on an assumed solids content of 83% in as-disposed ash.

The parameter values used for modeling methane emissions attributable to landfilled ash from lumber mills were the same as those used for pulp and paper mills (see Table S31). Results are shown in Table S42. The emissions are much lower than those attributable to ash disposal at pulp and paper mills because the amounts of ash disposed are much lower.

**Table S42**. Methane Emissions Attributable to Landfilled Boiler Ash from Lumber Mills

| Year | Metric Tons Methane Emitted | Fraction of 1990 Value – Reflects Only Changes in Lumber Production | Fraction of 2005 Value – Reflects Only Changes in Lumber Production |
| --- | --- | --- | --- |
| 1990 | 1.100 | 1.00 |  |
| 2005 | 1,400 | 1.31 | 1.00 |
| 2020 | 1,500 | 1.41 | 1.08 |

*Estimates for Other Wastes from Lumber Mills*

CORRIM studies39 were used to develop a factor for estimating the amounts of non-ash solid waste landfilled at lumber mills. Data were taken from LCA reports on softwood lumber from the Pacific Northwest and Southeast US 25,26. For all processes in the mill, the reported quantities of “dirt and rocks,” “general trash,” “woody material,” and “other organics” were added together and then summed for all processes. The result was rounded to an “other waste” generation rate of 0.009 kg/m3 of lumber, which was used for all years. This factor was multiplied by the production of lumber, downloaded from FAOSTAT20, for every year from 1960 to 2020. As a result, the year-to-year changes in production of “other waste” are entirely reflective of changes in production.

The DOC values in GHGRP Subpart TT10 (US EPA 2023a) are on a wet weight basis; therefore, the dry weights estimated herein were converted to wet weights using a solids content of 85% based on the fact that the GHGRP DOC is taken from IPCC 7, where the associated water content is 15%.

The GHGRP Subpart TT defaults for non-ash waste from wood and wood products mills are shown in Table S43. Note that the DOC for non-ash wastes is more than double the corresponding value for miscellaneous wastes from pulp and paper mills (0.2).

**Table S43**. Wood Product Non-Ash Waste Parameter Values for First Order Decay Model

| Parameter | Units | GHGRP, Subpart TT10 |
| --- | --- | --- |
| DOC | kg organic C/kg wet waste | 0.43 |
| DOCf | Fraction of DOC that will degrade in landfill | 0.5 |
| k | yr-1 | 0.02 (dry climate)  0.03 (moderate climate)  0.04 (wet climate) |
| MCF | Fraction of degradable carbon that is subject to anaerobic conditions | 1 |
| F | Fraction by volume of CH4 in landfill gas, as generated | 0.5 |
| OX | Fraction of CH4 that is oxidized before it is released to the atmosphere | 0.1 (values ranging from 0.0 to 0.35 are listed with the choice depending on site-specific circumstances) |

The estimated emissions associated with landfilled non-ash waste from lumber mills, derived using the GHGRP Subpart TT default DOC for “wood and wood product [wastes] (other than industrial sludges)” are shown in Table S44. It is likely that these estimates are too high given the nature of the material involved. The major components of this waste are likely to be wood-derived materials that are not usable as raw material or fuel due to their contamination with soil and other debris. The default DOC of 0.43 at 85% solids equates to a carbon content of 50% of dry weight (which is reasonable if most of the material is woody). However, the default GHGRP value for the fraction of carbon degradable in the landfill is 50%, which is not reasonable given current research. US EPA’s Waste Reduction Model (WARM), for instance, considers 88% of the carbon in lumber and 77% of the carbon in branches to be nondegradable in anaerobic landfills40.

**Table S44.** Methane Emissions Attributable to Landfilled Non-Ash Solid Waste from Lumber Mills Using GHGRP Subpart TT Default Valuesa

| Year | Metric Tons Methane Emitted | Fraction of 1990 Value | Fraction of 2005 Value |
| --- | --- | --- | --- |
| 1990 | 60 | 1.00 |  |
| 2005 | 80 | 1.40 | 1.00 |
| 2020 | 90 | 1.54 | 1.10 |
| a Changes reflect only changes in production of lumber. | | | |

If one uses an assumption that 80% of the carbon is nondegradable (DOCf = 0.2) instead of the GHGRP Subpart TT value (DOCf = 0.5), estimated methane production decreases by 60%. The effect of this is approximately equivalent to using the DOC for miscellaneous wastes from pulp and paper mills (0.2) and a DOCf of 0.5. The alternative estimates, using a DOC of 0.43 (GHGRP Subpart TT default for non-ash waste at wood products mills) and a DOCf of 0.2 are shown in Table S45. These values are used in this profile in places where a single estimate is required.

**Table S45**. Methane Emissions Attributable to Landfilled Non-Ash Solid Waste from Lumber Mills – Using GHGRP Subpart TT Default Values Except for DOCf (Using 0.2 Instead of 0.5)

| Year | Metric Tons Methane Emitted | Fraction of 1990 Valuea | Fraction of 2005 Valuea |
| --- | --- | --- | --- |
| 1990 | 24 | 1.00 |  |
| 2005 | 33 | 1.40 | 1.00 |
| 2020 | 36 | 1.54 | 1.10 |
| a Changes reflect only changes in production of lumber. | | | |

## **Emissions from Wood Product Facility Landfills – Panel Plants**

*Estimates for Panel Plant Boiler Ash*

The approach to estimating methane attributable to landfilled boiler ash at panel plants was the same as described earlier for lumber mills. The amounts of landfilled ash were estimated from fuel consumption reported in EIA MECS reports15. Ash generation rate was estimated to average about 2.39 kg dry ash per m3 of panel (considering all years with EIA MECS data). Because of limited data and little evidence that there was a trend over time, this value was used for all years. This factor was multiplied by the production of panels, downloaded from FAOSTAT, every year from 1960 to 2020 20. As a result, the year-to-year changes in emissions are entirely reflective of changes in production. The fraction of ash landfilled was assumed to be the same as that for lumber mills, described previously.

US EPA’s current default DOC values for boiler ash are based on as-disposed solids content. Therefore, for the calculations in this update, DOC was converted to a dry basis using the same assumptions for solids content as used for lumber mills (i.e., 83% solids).

The parameter values used for modeling methane emissions attributable to landfilled ash from panel plants were the same as those used for pulp and paper mills (see Table S31). Results are shown in Table S46. The emissions are much lower than those attributable to ash disposal at pulp and paper mills and lumber mills because the amounts of ash disposed are much lower.

**Table S46.** Methane Emissions Attributable to Landfilled Boiler Ash from Panel Plants

| Year | Metric Tons Methane Emitted | Fraction of 1990 Valuea | Fraction of 2005 Valuea |
| --- | --- | --- | --- |
| 1990 | 54 | 1.00 |  |
| 2005 | 87 | 1.62 | 1.00 |
| 2020 | 107 | 2.00 | 1.23 |
| a Changes reflect only changes in production of panels. | | | |

*Other Wastes from Panel Plants*

CORRIM studies39 were used to develop a factor for estimating the amounts of non-ash solid waste landfilled at panel plants. Data taken from LCA reports on plywood from the Pacific Northwest and Southeast US were used 41,42. The data are limited; therefore, NCASI used a simple average of “solid waste – wood waste” from these two reports. This produced a generation rate of 20 dry kg waste per cubic meter of plywood, which was used for all years. This factor was multiplied by the production of panels, downloaded from FAOSTAT, every year from 1960 to 2020 20. As a result, the year-to-year changes in disposal quantity and emissions are entirely reflective of changes in production.

The DOC values in GHGRP Subpart TT are on a wet weight basis; therefore, the dry weights estimated herein were converted to wet weights using a solids content of 85% based on the fact that the Subpart TT DOC is taken from IPCC7, in which the associated water content is 15%.

The GHGRP Subpart TT defaults for non-ash waste from wood and wood products mills are shown in Table S43. Note that the DOC for non-ash wastes is more than double the corresponding value for miscellaneous wastes from pulp and paper mills (0.2).

The estimated emissions associated with landfilled non-ash waste from panel plants, derived using the GHGRP Subpart TT default DOC for “wood and wood product [wastes] (other than industrial sludges)” are shown in Table S47. As noted earlier, it is likely that these estimates are too high given the nature of the material involved. If the calculations are performed using an assumption that 80% of the carbon is nondegradable (DOCf = 0.2) instead of the Subpart TT value (DOCf = 0.5), estimated methane production decreases by 60%. This is approximately equivalent to using the DOC for miscellaneous wastes from pulp and paper mills (0.2) and a DOCf of 0.5. The alternative estimates, using a DOC of 0.43 (Subpart TT default for non-ash waste at wood products mills) and a DOCf of 0.2 are shown in Table S48. These values are used as the base case estimates in this profile. These values suggest that non-ash wastes from panel plants (and other mills that are not lumber mills) contribute approximately 90% of emissions from landfilled wastes in the wood products sector.

**Table S47**. Methane Emissions Attributable to Landfilled Non-Ash Solid Waste from Panel Plants Using GHGRP Subpart TT Default Parameter Values10

| Year | Metric Tons Methane Emitted | Fraction of 1990 Valuea | Fraction of 2005 Valuea |
| --- | --- | --- | --- |
| 1990 | 38,000 | 1.00 |  |
| 2005 | 66,000 | 1.77 | 1.00 |
| 2020 | 83,000 | 2.21 | 1.25 |
| a Changes reflect only changes in panel production. | | | |

**Table S48**. Methane Emissions Attributable to Landfilled Non-Ash Solid Waste from Panel Plants – Using GHGRP Subpart TT Default Values10 Except for DOCf (Using 0.2 Instead of 0.5)

| Year | Metric Tons Methane Emitted | Fraction of 1990 Valuea | Fraction of 2005 Valuea |
| --- | --- | --- | --- |
| 1990 | 15,100 | 1.00 |  |
| 2005 | 26,600 | 1.77 | 1.00 |
| 2020 | 33,200 | 2.21 | 1.25 |
| a Changes reflect only changes in panel production. | | | |

# **CALCULATING TRANSPORT-RELATED EMISSIONS**

## **Using Data from the Commodity Flow Survey**

Every 5 years (ending in 2 or 7) a congressionally mandated survey, called the Commodity Flow Survey (CFS), is distributed under the auspices of the US Department of Transportation and the US Department of Commerce.43 The survey collects data on commodity shipments from a sample of establishments in specific industries (identified by NAICS code). The results of the survey can be used to develop sample-based estimates of, for instance, total ton-miles of wheat shipped in the US. (Note: For 1990, SGTC ton-miles reported in the 1992 survey were incorrect. The correct values are shown in the subsequent CFS report.) The commodities included in the survey are identified by SCTG codes. The two-digit SCTG codes are shown in Table S49.

**Table S49**. Two-Digit SCTG Commodity Code List 44

| SCTG  2-Digit Code | Commodity Description |
| --- | --- |
| 01 | Live Animals and Fish |
| 02 | Cereal Grains (including seed) |
| 03 | Agricultural Products Except for Animal Feed, Cereal Grains, and Forage Products |
| 04 | Animal Feed, Eggs, Honey, and Other Products of Animal Origin |
| 05 | Meat, Poultry, Fish, Seafood, and Their Preparations |
| 06 | Milled Grain Products and Preparations, and Bakery Products |
| 07 | Other Prepared Foodstuffs, Fats and Oils |
| 08 | Alcoholic Beverages and Denatured Alcohol |
| 09 | Tobacco Products |
| 10 | Monumental or Building Stone |
| 11 | Natural Sands |
| 12 | Gravel and Crushed Stone Except Dolomite and Slate |
| 13 | Other Nonmetallic Minerals Not Elsewhere Classified |
| 14 | Metallic Ores and Concentrates |
| 15 | Coal |
| 16 | Crude Petroleum |
| 17 | Gasoline, Aviation Turbine Fuel, and Ethanol, Including Kerosene, and Fuel Alcohols |
| 18 | Fuel Oils Including Diesel, Bunker C, and Biodiesel |
| 19 | Other Coal and Petroleum Products, Not Elsewhere Classified |
| 20 | Basic Chemicals |
| 21 | Pharmaceutical Products |
| 22 | Fertilizers |
| 23 | Other Chemical Products and Preparations |
| 24 | Plastics and Rubber |
| 25 | Logs and Other Wood in the Rough  (Note that the CFS does not include shipments from the forest to mills by companies classified as forestry and logging companies) |
| 26 | Wood Products |
| 27 | Pulp, Newsprint, Paper, and Paperboard |
| 28 | Paper or Paperboard Articles |
| 29 | Printed Products |
| 30 | Textiles, Leather, and Articles of Textiles or Leather |
| 31 | Nonmetallic Mineral Products |
| 32 | Base Metal in Primary or Semifinished Forms and in Finished Basic Shapes |
| 33 | Articles of Base Metal |
| 34 | Machinery |
| 35 | Electronic and Other Electrical Equipment and Components, and Office Equipment |
| 36 | Motorized and Other Vehicles (including parts) |
| 37 | Transportation Equipment, N.E.C. |
| 38 | Precision Instruments and Apparatus |
| 39 | Furniture, Mattresses and Mattress Supports, Lamps, Lighting Fittings, and Illuminated Signs  39019 Other household or office furniture, not elsewhere classified, including kitchen cabinets (except desk top furniture, which is classified by its material; and TV and stereo cabinets, see 35820)  39021 Medical, surgical, dental, or veterinary furniture  39029 Other Furniture, not elsewhere classified |
| 40 | Miscellaneous Manufactured Products  40920 Prefabricated buildings including tool or garden sheds  40999 Other miscellaneous manufactured products, not elsewhere classified |
| 41 | Waste and Scrap  41210 Sawdust and wood waste and scrap  41220 Waste and scrap of paper or paperboard  41299 Other nonmetallic waste and scrap, not elsewhere classified |
| 43 | Mixed Freight |

The CFS is distributed to a sample of facilities representing industries considered “in scope.” The in-scope industries for the 2017 survey, identified by NAICS code, are shown in Table S50.

**Table S50**. In-Scope Industries for the 2017 CFS (See Table 2 in 2017 Commodity Flow Survey Report 45)

| NAICS Code | Industry |
| --- | --- |
| 212 | Mining (except oil and gas) |
| 311 | Food manufacturing |
| 312 | Beverage and tobacco product manufacturing |
| 313 | Textile mills |
| 314 | Textile product mills |
| 315 | Apparel manufacturing |
| 316 | Leather and allied product manufacturing |
| 321 | Wood product manufacturing |
| 322 | Paper manufacturing |
| 323 | Printing and related support activities |
| 324 | Petroleum and coal products manufacturing |
| 325 | Chemical manufacturing |
| 326 | Plastics and rubber products manufacturing |
| 327 | Nonmetallic mineral product manufacturing |
| 331 | Primary metal manufacturing |
| 332 | Fabricated metal product manufacturing |
| 333 | Machinery manufacturing |
| 334 | Computer and electronic product manufacturing |
| 335 | Electrical equipment, appliance, and component manufacturing |
| 336 | Transportation equipment manufacturing |
| 337 | Furniture and related product manufacturing |
| 339 | Miscellaneous manufacturing |
| 4231 | Motor vehicle and parts merchant wholesalers |
| 4232 | Furniture and home furnishing merchant wholesalers |
| 4233 | Lumber and other construction materials merchant wholesalers |
| 4234 | Commercial equipment merchant wholesalers |
| 4235 | Metal and mineral (except petroleum) merchant wholesalers |
| 4236 | Electrical and electronic goods merchant wholesalers |
| 4237 | Hardware and plumbing merchant wholesalers |
| 4238 | Machinery, equipment, and supplies merchant wholesalers |
| 4239 | Miscellaneous durable goods merchant wholesalers |
| 4241 | Paper and paper product merchant wholesalers |
| 4242 | Drugs and druggists' sundries merchant wholesalers |
| 4243 | Apparel, piece goods, and notions merchant wholesalers |
| 4244 | Grocery and related product merchant wholesalers |
| 4245 | Farm product raw material merchant wholesalers |
| 4246 | Chemical and allied products merchant wholesalers |
| 4247 | Petroleum and petroleum products merchant wholesalers |
| 4248 | Beer, wine, and distilled alcoholic beverage merchant wholesalers |
| 4249 | Miscellaneous nondurable goods merchant wholesalers |
| 4541 | Electronic shopping and mail-order houses |
| 45431 | Fuel dealers |
| 4841 | General freight trucking |
| 4842 | Specialized freight trucking |
| 4931 | Warehousing and storage |
| 5111 | Newspaper, periodical, book, and directory publishers |
| 51223 | Music publishers |
| 551114 | Corporate, subsidiary, and regional managing offices |

## **Transport Emissions from Roundwood Shipments**

Since 2002, the in-scope NAICS code lists for the CFS have not included NAICS code 113, forestry and logging. Therefore, the data on shipments of logs and other wood in the rough (SCTG 25) do not include wood shipments from the forest to mills by companies classified as forestry and logging companies. This is why quantities of SCTG 25 shipments reported in the CFS43 (approximately 23.3 million metric tons) are much less than total roundwood production in the US of over 250 million metric tons (calculated from 15.9 billion cubic feet of roundwood harvested reported for 2017 by Howard and Liang 201923). As a result, various sources of information have been used to estimate emissions from roundwood shipments. The data sources and resulting factors are described in the Methods section of the paper.

## **Transport Emissions from Wood Product Shipments**

The CFS provides estimates of shipments of a given commodity from all in-scope industries. In the case of wood products, this means that multiple shipments will often be reported for the same piece of wood. For instance, if a lumber mill (NAICS in-scope code 321) ships lumber (SCTG code 26212) to a door manufacturer, the shipment of lumber is reported. When the door manufacturer (also NAICS code 321) ships the door (SCTG code 26401) to a garden shed company, that shipment is reported. When the garden shed company (also NAICS in-scope code 321) ships the shed (SCTG code 40920) to a retailer, that shipment is recorded. In this process, shipments involving a portion of the original wood have been reported four times.

It should also be noted that the shipments of some wood products in SCTG 26 include non-wood materials, for instance the glass panes in windows (SCTG 26401), that are not part of the forest industry value chain. On the other hand, SCTG 26 does not include some wood products (e.g., wood furniture). Imports and exports can also influence the interpretation of CFS data. While the shipments associated with moving products into the US are not included, subsequent shipments within the US (e.g., lumber produced in the US from imported logs) are included. While transport of exports to other countries is included, transport of US products within foreign countries is not included.

The CFS reports total shipments of wood products (SCTG 26) originating from all in-scope NAICS codes of 293 million metric tons in 2017. Looking only at wood products shipments from NAICS code 321 (wood products manufacturing, including secondary products like flooring, windows, doors, premanufactured wood structures), CFS reports that shipments equaled about 187 million metric tons. This constituted 64% of all shipments of wood products. An additional 28% of the total wood product shipments were from durable goods merchant wholesalers (NAICS 423). These values can be compared to 2017 US production of primary wood products (i.e., lumber, panels, engineered wood products) by NAICS 321 in the range of 65 to 80 million metric tons (66 million metric tons calculated from Table 8b in Howard and Liang 2019 23, adding lumber, plywood, veneer, panels, and other industrial products and 78 million metric tons estimated from FAOSTAT data46). Total shipments from wood products mills (NAICS 321) reported in the CFS are, therefore, 2.3 to 2.9 times total US production. Most of this can be attributed to the sequential shipments.

The inclusion of sequential shipments of the same piece of wood helps capture the movement of wood along the value chain and may, therefore, provide a reasonable basis for estimating transport-related value chain emissions. On the other hand, as noted earlier, total shipments include the weight of non-wood components in some products while excluding other wood-based products. The relative importance of these two factors, and others that might affect wood products data in the CFS, is difficult to assess. The data extracted from the CFS for wood products is shown in Table S51.

**Table S51**. Shipping Data from the 2017 Commodity Flow Survey for Wood Products

| Commodity >>>> | Wood Products SCTG 26 | | |
| --- | --- | --- | --- |
| NAICS code | Metric tons (1000s) | Metric ton-km (millions) | Average km per shipment |
| 321 Wood product manufacturing | 186,574 | 98,496 | 605 |
| 322 Paper manufacturing | 744 | 404 | 267 |
| 323 Printing and related support | 0d | 0d | 1,067 |
| 423 Merchant wholesalers, durable goods | 83,288 | 23,133 | 238 |
| 424 Merchant wholesalers, nondurable goods | 0d | 0d | 349 |
| Other | 22,821 | 7,547 |  |
| Total | 293,426 | 129,580 | 563 |
| d Assumed to be zero. | | | |

Emissions are calculated by multiplying the metric ton-km values above by emission factors. It was assumed that all transport is by heavy duty truck or rail. The ratio of these two transportation modes was determined from CFS data 43. The emission factors used for heavy-duty trucks are shown in Table S52.

Emission factors for rail were obtained from the US Department of Transportation based on reported fuel efficiencies 332, 414, and 487 short ton-miles per gallon of fuel consumed in 1990, 2005, and 2020, respectively 47 . Using emission factors for diesel fuel (see Table S52), these values can be converted to emission factors of 0.0211, 0.0169, and 0.0144 kg CO2 per metric ton-km, respectively. Assuming that all transport of products was by truck or rail, these factors for trucking and rail transport were weighted (based on metric ton-km for each mode of transport (US Census Bureau 2023)) to derive an overall emission factor for each commodity. The weighted factors are shown in Table S53.

**Table S52.** Assumptions and Values Used to Calculate Heavy Duty Truck Emissions

| Variable | Value | Source |
| --- | --- | --- |
| Roundwood transported (includes firewood) | 1990, 445 million metric tons  2005, 408 million metric tons  2020, 376 million metric tons | FAOSTAT 202346, converted from cubic meters using a factor of 0.87 metric ton per cubic meter (from FAO 2020, Table 2.3.1, average of conifer and non-conifer) |
| Haul mode | Diesel truck | Assumed |
| Haul distance | 100 km one-way (round trip emissions assumed to be 1.75 times one-way emissions to account for empty return to the forest) | 25,26,48–53 |
| Fuel economy | 2.56 km/l (6.2 mpg) in 2020. Lower to 2.4 km/l for 2005 and 1990 | Davis and Boundy 202254, Table 2.16, converted using 129,000 Btu per gallon diesel |
| Average load | 20 metric tons (22 short tons) | 51,52,55,56 |
| Diesel emission factor | 2.7 kg CO2/liter (10.21 kg CO2 per gallon) | USEPA 201457, CO2 only, does not include upstream emissions associated with fuel production |
| Emissions per km | 1.02 kg CO2/km in 2020, 1.12 kg CO2/km in 2005 and 1990 | Calculated |
| Emissions per metric ton-km based on 20 metric ton load and one-way haul distance | 0.0512, 0.0562 and 0.0560 kg CO2 per metric ton-km for 1990, 2005, and 2020 respectively | Calculated |

**Table S53.** Emission Factors for a Mix of Truck and Rail Transport for Forest Products

| SCTG Commodity Code – Description | Emission Factor for a Mix of Truck and Rail Transport  (kg CO2 per metric ton-km) | | |
| --- | --- | --- | --- |
| 1990 | 2005 | 2020 |
| SCTG 26 – Wood products | 0.0515 | 0.0511 | 0.0464 |
| SCTG 27 – Pulp, newsprint, paper, and paperboard | 0.0501 | 0.0495 | 0.0449 |
| SCTG 28 – Paper or paperboard articles | 0.0546 | 0.0546 | 0.0497 |
| SCTG 29 – Printed products | 0.0560 | 0.0562 | 0.0512 |

Emissions associated with transporting pellets were estimated separately as described in the Methods Section of the Paper.

## **Transport Emissions from Paper Product Shipments**

AF&PA reports that in 2017 the US industry produced 71.9 million metric tons of paper and paperboard (including newsprint) and 8.3 million metric tons of market pulp 19. US mills, therefore, shipped 80.2 million metric tons of primary product in 2017. By comparison, the CFS indicates that, in 2017, shipments of pulp, newsprint, paper, and paperboard (SCTG 27) equaled 126 million metric tons43. Of this, 70% or 88 million metric tons were from NAICS 322, which includes pulp, paper, and paperboard mills as well as a variety of converting operations. An additional 26% of the total shipments of SCTG 27 was from merchant wholesalers of durable and nondurable goods. The shipments of pulp, newsprint, paper, and paperboard (SCTG 27) from NAICS 322 (88 million metric tons) are much closer to the annual production (80.2 million metric tons) than is the case for wood products, discussed earlier.

As noted previously for wood products, one must be aware of the potential for the data to be impacted by (1) non-paper components of some items in SCTG 27 and (2) imports and exports.

These shipments of paper products (SCTG 27) are separate from the 74 million metric tons of shipments of “paper or paperboard articles” (SCTG 28), 67% of which were from paper and paperboard mills (i.e., NAICS 322) and 25% from merchant wholesalers. In addition, shipments of SCTG 28, printed products (which includes products printed on non-paper substrates) amounted to an additional 25 million metric tons in 2017.

The data extracted from the CFS for paper and related products, are shown in Table S54. Emissions were calculated by multiplying these values by the appropriate emission factor in Table S53.

**Table S54.** Shipping Data from the 2017 Commodity Flow Survey for Paper Products

| Commodity >>>> | Pulp, Newsprint, Paper, and Paperboard SCTG 27 | | | Paper or Paperboard Articles SCTG 28 | | | Printed Products SCTG 29 | | |
| --- | --- | --- | --- | --- | --- | --- | --- | --- | --- |
| NAICS code | Metric tons (1000s) | Metric ton-km (millions) | Average km per shipment | Metric tons (1000s) | Metric ton-km (millions) | Average km per shipment | Metric tons (1000s) | Metric ton-km (millions) | Average km per shipment |
| 321 Wood product manufacturing | 113 | 155 | 650 | 52 | 77b | 196 | 52c | 77b | 1,873 |
| 322 Paper manufacturing | 88,253 | 88,175 | 814 | 49,179 | 25,637 | 695 | 943 | 802 | 1,220 |
| 323 Printing and related support | 1,019 | 774 | 951 | 352 | 407 | 996 | 15,878 | 10,976 | 1,223 |
| 423 Merchant wholesalers, durable goods | 16,515 | 5,082a | 378 | 7,635 | 2,584 | 781 | 1,583 | 397 | 1,099 |
| 424 Merchant wholesalers, nondurable goods | 16,856 | 5,082 | 206 | 12,888 | 6,846 | 1,048 | 2,177 | 1,657 | 1,041 |
| Other | 4,155 | 22,457 |  | 3,397 | 2,852 |  | 4,767 |  |  |
| Total | 126,912 | 121,725 | 429 | 73,504 | 38,405 | 928 | 25,400 | 16,233 | 772 |
| a Assumed to be the same as NAICS code 424.  b Assumed one-half of value for SCTG 27.  c Assumed to be the same as paperboard articles SCTG 28. | | | | | | | | | |

## **Emissions from Pellet Transport**

Pellet production in 2005 was estimated to be 1 million metric tons (from Figure 1 in Abt et al.58) while pellet production in 2019 (used to represent 2020) was 8.837 million metric tons 59. Pellet production was assumed to be zero in 1990. Approximately 70% of pellets were exported in 2019, primarily to Europe59. This was assumed to be true for 1990, 2005, and 2020. Based on this information, all pellets were assumed to be hauled by a combination of truck and rail, and then 70% were assumed to be shipped by ocean bulk carriers to Europe. Over land haul distance was set at 563 km (350 mi), the average haul distance per shipment for wood products (SCTG 26) in the CFS43. The emission factors used for overland shipments of pellets were calculated using the same information as used for wood products (including the ratio of truck to rail transport). Additional emissions associated with transport by bulk ocean carrier were calculated for pellets exported to Europe. The distance was assumed to be 6,500 km. The International Marine Organization has published emission factors for bulk ocean freight of 0.0041 kg CO2 per metric ton-km (6.9 g CO2 per short ton-nautical mile) in 2008 and 0.0066 kg CO2 per metric ton-km (11.08 g CO2 per short ton-nautical mile) in 2018 60. The 2018 value was used to represent 2020 while the 2008 value was used for 1990 and 2005.

## **Emissions from Transporting Non-Fiber, Non-Fuel Inputs to Manufacturing**

Life cycle studies were used to determine the quantities of non-fiber, non-fuel inputs to manufacturing for major grades of forest products. For containerboard, it was determined that there were 0.053 metric tons of non-fiber, non-fuel inputs per ton of product 61. For uncoated freesheet, coated freesheet, uncoated mechanical paper and coated mechanical paper this value was determined to be 0.277, 0.375, 0.081 and 0.362 metric tons of non-fiber, non-fuel inputs per ton of product, respectively 62. For lumber mills, non-fiber, non-fuel inputs were required at a rate of 0.437 kg per cubic meter of product (based on average of data in two LCA studies 25,26) while the value for panel plants was calculated to be 18.17 kg per cubic meter product (average of three studies 42,42,48). For wood products other than lumber, the value for panels was used. Conversions were necessary in some cases to derive as-shipped weights.

To calculate quantities of non-fiber, non-fuel inputs, the grades of pulp, paper, and paperboard were assigned to the appropriate factors and multiplied by the quantities produced in 1990, 2005, and 2020, using statistics from AF&PA 17,19. The same approach was used for wood products. All non-lumber products were assigned the factors for panels. Production data were obtained from FAOSTAT20.

Transport distances were derived from CFS data43. For inputs to the pulp, paper, and paperboard sector, transport distances of non-fiber, non-fuel inputs were assumed to be represented by an average of commodity codes SCTG 12 (gravel and crushed stone) shipped to all users, SCTG 20 (basic chemicals) shipped to NAICS 322 (paper and paperboard mills,) and SCTG 31 (nonmetallic mineral products) also shipped to NAICS 322 (paper and paperboard mills). In the 2017 CFS, the average of these was 207 km. For wood products, transport distances for non-fiber, non-fuel inputs were represented by SCTG 20 (basic chemicals) shipped to manufacturing facilities (NAICS 31–33). In the 2017 CFS this distance was 365 km.

# **EMISSIONS FROM NON-INDUSTRIAL USE OF WOOD-BASED FUELS**

The amounts of wood energy used in the US up to 2017 are reported by the US Forest Service23. The US Forest Service assigns domestic wood energy consumption to residential, commercial, industrial, and electricity utility sectors. The consumption in the industrial sector is due almost entirely to the use of wood-derived materials for fuel at forest products manufacturing facilities. Emissions from the use of these materials are accounted for elsewhere in this profile and are excluded from the estimates here.

In addition to domestic consumption, wood pellet exports have become increasingly important. For this report, pellet export data since 2012 were obtained from the US Department of Agriculture Global Agricultural Trade System (GATS)63. It was assumed that these exports were zero in 1990 and increased linearly until the first GATS data in 2012. The residential sector consumes about one-half of nonindustrial wood energy. Recent growth sectors have been electric utilities and pellet exports. Exported pellets are primarily used to produce electricity in the importing countries.

European Integrated Pollution Prevention and Control Bureau (IPCC) emission factors 7were used to estimate methane and nitrous oxide emissions from these sectors. For the residential sector, emissions are highly variable depending on combustion conditions. For this report, IPCC’s methane emission factor for noncatalytic wood stoves was used (497 kg CH4/Tg energy input). For all other sectors, IPCC uses a value of 11 kg CH4/Tg energy input. IPCC has no value for nitrous oxide from residential consumption of wood for energy; therefore, IPCC’s factor for other sectors was used (7 kg N2O/Tg energy input).

# **DATA AND CALCULATIONS OF END-OF-LIFE EMISSIONS FOR FOREST PRODUCTS**

At end-of-life, forest products are recycled, landfilled, combusted, or diverted to a beneficial use (e.g., composting). End-of-life GHG emissions from combustion (primarily municipal solid waste [MSW] waste-to-energy) are not included because US EPA estimates that emissions of N2O and CH4 associated with MSW combustion, in total, are less than 0.5 million metric tons of CO2e per year, and only a fraction of this can be attributed to forest products11. Note that carbon dioxide produced by combustion of forest products in MSW is not included because it is part of the calculation of changes stocks of carbon in forest products presented earlier in this report.

EPA’s annual inventory indicates that total GHG emissions from composting in 2020 were 4.3 million metric tons CO2eq. per year11. The wastes creating these emissions are, according to US EPA, “primarily yard trimmings (grass, leaves, and tree and brush trimmings) and food scraps from the residential and commercial sectors (such as grocery stores; restaurants; and school, business, and factory cafeterias)”11. There is no reason, therefore, to suspect that paper and wood products are a significant source of GHGs from composting, so these potential emissions are not considered in this analysis. The calculations in this report, therefore, are limited to GHG emissions from landfills attributable to discarded forest products.

The starting point for the calculations is US EPA’s annual inventory values for total MSW landfill methane emissions and the fraction attributable to forest products has then been calculated12. An advantage of using EPA’s estimates is that they are based on a combination of methane measurements and modeling, which would be expected to be more accurate than results from modeling alone. A disadvantage of this method is that it does not use the “production approach”, meaning that the emissions are not specifically attributable to products made from wood harvested in the US. Instead, this approach calculates methane emissions attributable to all forest products disposed of in US landfills, regardless of where the wood was harvested.

It is difficult to precisely determine the expected difference between the two approaches. An emissions estimate based, at least in part, on direct measurements would be expected to be more accurate than one based only on modeling. There are significant uncertainties, however, in estimating the fraction of these emissions attributable to domestic production of forest products. First, the forest products in landfills come from both domestic and non-domestic production. Second, methane emissions from landfills are attributable to all decomposable materials placed in landfills, of which forest products are only a fraction.

The potential impacts of non-domestic forest products in landfills can be examined in several ways. One is by comparing imports and exports of forest products. Over the past several decades, with the exception of lumber, imports and exports of forest products have been comparable23. Assuming the end-of-life fates of imported and exported products are the same, the impacts of exported forest products would be expected to be approximately offset by the impacts of imported forest products, which are included.

In the case of lumber, a large fraction of the material deposited in landfills is nondegradable and does not contribute to methane emissions. Wang et al.64, for instance, found that only 0 to 19.9% of the carbon in a range of wood products was degradable under anaerobic conditions. For wood products derived from softwood, like most lumber, the range was 0 to 1.8%. In addition, over the period of record, imports of lumber have been larger than exports, so to the extent that these products contribute to methane emissions from landfills, considering all methane, regardless of the source of the wood, will tend to overestimate the amounts attributable to lumber produced from wood harvested in the US, resulting in a conservative estimate.

More difficult to assess is the potential impact of (1) paper, paperboard, and wood associated with containers used to package or ship imported products and (2) other imported consumer products that are comprised, in part, of paper, paperboard, or wood.

The difficulty caused by these materials is exemplified by comparing US EPA’s various estimates of MSW quantities. In its most recent “Advancing Sustainable Materials Management” report, US EPA estimates that in 2018, 133 million metric tons of material were landfilled in the US 65. In the annual inventory of emissions and sinks, however, US EPA estimates that 213 million metric tons of MSW were landfilled in 2018 12, an estimate 1.6 times that in the “Advancing Sustainable Materials Management” report. US EPA provides the following explanation for the difference:

The EREF-extrapolated estimate of total MSW landfilled for 2017 and 2018 [i.e., the value in the USEPA inventory12] is based on a bottom-up approach using information at the facility-level to estimate MSW for the sector as a whole, while the Facts and Figures report65 uses a top-down (materials flow mass balance) approach to estimate the same quantity. The materials flow methodology is generally based on production data for each material at the state- (recycling, composting) or national- (waste generation) level.12

The factors contributing to the difference have also been examined by Staley and Kantner66.The potential impact of imported products is specifically acknowledged in US EPA’s description of methods used in the Facts and Figures report65, where US EPA identifies the need to adjust for packaging of imported goods but finds that “current data for adjustments for packaging of imported goods are not available.”

While it is not possible to precisely estimate the impact of forest products used for packaging or shipping, or otherwise associated with imported consumer goods, the nature of the effect may be examined by comparing imports and exports of consumer goods. According to data from the Bureau of Economic Analysis in the Department of Commerce, imports of consumer goods are typically much larger than exports67. The amounts of paper and paperboard packaging disposed of in the US are, therefore, larger than they would be if they only included material of domestic origin. Using data from the Bureau of Economic Analysis67, NCASI estimates that, excluding vehicles, food, and energy, net imports of consumer goods to the US account for about 15 to 20% of personal consumption expenditures for these goods. This is large enough to suggest that packaging for imports of consumer goods may affect estimates of the quantity and origin of paper and paperboard in MSW.

Because some landfilled forest products are of non-domestic origin, measurements and models of gas production from all landfilled MSW are larger than they would be if only material of domestic origin was being landfilled. Hence, estimates based on the total methane attributable to landfilled paper and paperboard may overstate the contribution of the US forest products industry.

While it is difficult to adjust methane emission measurements to account for non-domestic forest products, it is possible to adjust the emissions to isolate the role of forest products compared to other degradable materials. To estimate the fraction of methane attributable to forest products, we separately modeled the decay of all decomposable fractions of MSW deposited in landfills since 1960. The data on deposits were taken from US EPA65. Parameter values for decay rates and nondegradable carbon were taken from the documentation for version 15 of US EPA’s Waste Reduction Model (WARM)40. The analysis of year-to-year decomposition and methane production is described in detail in Supplemental Information.

The analysis of the role of forest products on methane generation at end-of-life is complicated by incomplete information on the amounts of construction and demolition (C&D) debris dedicated construction and debris landfills. US EPA estimates that in 2018, about 37.1 million metric tons of wood waste in C&D debris was generated in the US, and 26.9 million metric tons were disposed in C&D landfills68. This does not include the 11.1 million metric tons of wood disposed in MSW landfills in 201865.

In considering methane emissions from C&D landfills, it is important to understand that the conditions in C&D debris landfills do not promote methane production. The fact that C&D landfills produce far less methane than MSW landfills is due to several factors. One important factor is that readily degradable materials are not placed in C&D landfills. Another important factor, however, is that C&D waste often contains considerable amounts of sulfates, primarily from gypsum board69, which puts sulfate-reducing bacteria at a competitive advantage to methane-producing bacteria70. Indeed, US EPA observed that, in C&D landfills, other than odor-producing gases, “substantial quantities of [gases], such as CH4, are not produced, which is a reflection of the types of waste normally deposited in C&D landfills” 71. In addition, in the documentation for version 15 of US EPA’s WARM, US EPA notes that in the case of landfilled gypsum board, “the sulfate in wallboard is estimated to reduce methane generation; thus, the methane yield from gypsum board is likely to be negligible and is therefore adjusted to 0%”40. These observations support the assumption, for purposes of this report, that methane emissions from wood products in C&D landfills are negligible and can be ignored.

To estimate the fraction of MSW methane emissions attributable to forest products, we rely on USEPA data on inputs to landfills going back to 196068. These data, calculated as a percentage of all materials placed in landfills, are shown in Table S55.

From data in Table S55, the landfilled amounts of degradable materials were isolated. The degradable fractions include paper and paperboard, wood, food, and yard trimmings. The results are shown in Table S56.

As discussed above, these data do not account for materials used to package or ship exported and imported goods. The effects on the values in Tables S55 and S66 are not known.

After interpolating to provide annual data, the individual year’s contributions were modeled to determine the amount of degradable carbon lost from each type of waste in every year after it was deposited. A first order decay model was used to estimate the decomposition of degradable carbon. Nondegradable carbon was not included in the calculations. The parameter values used were those used by US EPA in version 15 of WARM 40, which are shown in Table S57. The values from US EPA’s WARM documentation are used in this report to estimate methane emissions attributable to forest products because other USEPA sources for parameter values do not allow separate examination of different components of the waste stream.

The calculation results, shown in Table S58, are estimates of the fraction of the loss of degradable carbon (the same as the fraction of methane generation) attributable to each type of waste over time. These are multiplied by the total methane generation reported by USEPA12 in the corresponding year to determine the methane emissions attributable to each type of waste.

Staley and Barlaz 72, using US EPA’s 2006 MSW disposal data, calculated that forest products may have produced approximately 60% of total ultimate landfill methane potential for waste disposed in that year. For that same year, this report estimates that forest products were responsible for approximately 40% of MSW landfills emissions (Table S58). It is important to note that Staley and Barlaz did not consider degradation rates, only ultimate methane potential; therefore, the two estimates are not directly comparable.

These estimates can also be compared to those recently developed by US EPA for methane from food waste73. US EPA estimates that food waste was responsible for 58% of landfill methane releases in 2020, which compares to an estimate for 2018 in Table S58 of 60%.

**Table S55.** Materials Going to Landfills, Percent of Total Landfilled Material 68

| Percent of Landfilled Materials |  |  |  |  |  |  |  |  |  |  |
| --- | --- | --- | --- | --- | --- | --- | --- | --- | --- | --- |
|  | 1960 | 1970 | 1980 | 1990 | 2000 | 2005 | 2010 | 2015 | 2017 | 2018 |
| Paper and Paperboard | 30.20% | 33.20% | 31.70% | 30.00% | 28.80% | 24.70% | 16.10% | 13.30% | 13.10% | 11.80% |
| Glass | 8.00% | 11.10% | 10.50% | 6.00% | 5.80% | 5.80% | 5.10% | 5.00% | 5.40% | 5.20% |
| Metals |  |  |  |  |  |  |  |  |  |  |
| Ferrous | 12.40% | 10.80% | 8.90% | 6.00% | 5.60% | 6.00% | 6.80% | 7.20% | 7.40% | 7.20% |
| Aluminum | 0.40% | 0.70% | 1.00% | 1.00% | 1.40% | 1.60% | 1.80% | 1.80% | 1.90% | 1.80% |
| Other nonferrous | 0.20% | 0.30% | 0.40% | 0.20% | 0.30% | 0.30% | 0.40% | 0.50% | 0.50% | 0.50% |
| *Total Metals* | *13.00%* | *11.80%* | *10.30%* | *7.20%* | *7.30%* | *7.90%* | *9.00%* | *9.50%* | *9.80%* | *9.50%* |
| Plastics | 0.50% | 2.60% | 5.00% | 9.50% | 14.20% | 16.40% | 17.90% | 18.90% | 19.10% | 18.50% |
| Rubber and leather | 1.80% | 2.40% | 3.00% | 3.20% | 2.80% | 2.90% | 3.20% | 3.30% | 3.50% | 3.40% |
| Textiles | 2.10% | 1.70% | 1.70% | 2.90% | 4.50% | 5.30% | 6.50% | 7.70% | 7.90% | 7.70% |
| Wood | 3.70% | 3.30% | 5.10% | 6.90% | 7.10% | 7.50% | 8.20% | 8.00% | 8.70% | 8.30% |
| Other | 0.10% | 0.40% | 1.50% | 1.40% | 1.80% | 1.80% | 2.10% | 2.20% | 2.20% | 2.00% |
| ***Total Materials in Products*** | ***59.40%*** | ***66.50%*** | ***68.80%*** | ***67.10%*** | ***72.30%*** | ***72.30%*** | ***68.10%*** | ***67.90%*** | ***69.70%*** | ***66.40%*** |
| **Other Wastes** |  |  |  |  |  |  |  |  |  |  |
| Food | 14.80% | 11.30% | 9.50% | 13.60% | 17.30% | 18.50% | 21.00% | 22.00% | 21.80% | 24.10% |
| Yard trimmings | 24.20% | 20.50% | 20.10% | 17.60% | 8.50% | 7.00% | 8.60% | 7.80% | 6.20% | 7.20% |
| Miscellaneous inorganic wastes | 1.60% | 1.60% | 1.60% | 1.70% | 1.90% | 2.20% | 2.30% | 2.30% | 2.30% | 2.30% |
| ***Total Other Wastes*** | ***40.60%*** | ***33.40%*** | ***31.20%*** | ***32.90%*** | ***27.70%*** | ***27.70%*** | ***31.90%*** | ***32.10%*** | ***30.30%*** | ***33.60%*** |
|  | 100.0% | 99.9% | 100.0% | 100.0% | 100.0% | 100.0% | 100.0% | 100.0% | 100.0% | 100.0% |
|  | | | | | | | | | | |

**Table S56.** Biodegradable Materials Sent to MSW Landfills [Based on USEPA 202068]

| As fraction of all MSW going to landfills | | | | | | | | |  |  |
| --- | --- | --- | --- | --- | --- | --- | --- | --- | --- | --- |
|  | 1960 | 1970 | 1980 | 1990 | 2000 | 2005 | 2010 | 2015 | 2017 | 2018 |
| Paper and Paperboard | 30.20% | 33.20% | 31.70% | 30.00% | 28.80% | 24.70% | 16.10% | 13.30% | 13.10% | 11.80% |
| Wood | 3.70% | 3.30% | 5.10% | 6.90% | 7.10% | 7.50% | 8.20% | 8.00% | 8.70% | 8.30% |
| Food | 14.80% | 11.30% | 9.50% | 13.60% | 17.30% | 18.50% | 21.00% | 22.00% | 21.80% | 24.10% |
| Yard Trimmings | 24.20% | 20.50% | 20.10% | 17.60% | 8.50% | 7.00% | 8.60% | 7.80% | 6.20% | 7.20% |
| Total biodegradable | 72.90% | 68.30% | 66.40% | 68.10% | 61.70% | 57.70% | 53.90% | 51.10% | 49.80% | 51.40% |
| As fraction of total biodegradable (leather and textiles not included to make fraction of forest products "conservative") | | | | | | | | | | |
|  | 1960 | 1970 | 1980 | 1990 | 2000 | 2005 | 2010 | 2015 | 2017 | 2018 |
| Paper and Paperboard | 41.43% | 48.61% | 47.74% | 44.05% | 46.68% | 42.81% | 29.87% | 26.03% | 26.31% | 22.96% |
| Wood | 5.08% | 4.83% | 7.68% | 10.13% | 11.51% | 13.00% | 15.21% | 15.66% | 17.47% | 16.15% |
| Food | 20.30% | 16.54% | 14.31% | 19.97% | 28.04% | 32.06% | 38.96% | 43.05% | 43.78% | 46.89% |
| Yard Trimmings | 33.20% | 30.01% | 30.27% | 25.84% | 13.78% | 12.13% | 15.96% | 15.26% | 12.45% | 14.01% |
|  | 100.00% | 100.00% | 100.00% | 100.00% | 100.00% | 100.00% | 100.00% | 100.00% | 100.00% | 100.00% |
|  | | | | | | | | | | |

**Table S57.** Parameters Used to Estimate the Contribution of Forest Products to MSW Landfill Methane

| Waste Material | Nondegradable Fraction of Carbon 40 | Half-Life of Degradable Carbon in Landfills, Years40 | |
| --- | --- | --- | --- |
| Paper and paperboarda | 0.56 | 11.9 | |
| Wood productsb | 0.86 | 7.3 | |
| Food waste | 0.16 | 3.6 | |
| Yard waste | 0.69 | 2.7 | |
| a Simple average of values for different types of paper and paperboard.  b Simple average of lumber and MDF. | | |

**Table S58.** Fraction of Methane Attributable to Each Type of Waste in MSW

| Year | Paper and paperboard | Wood | Food | Yard Waste |
| --- | --- | --- | --- | --- |
| 1960 | 0.412 | 0.016 | 0.361 | 0.211 |
| 1961 | 0.412 | 0.016 | 0.361 | 0.211 |
| 1962 | 0.408 | 0.016 | 0.362 | 0.214 |
| 1963 | 0.406 | 0.016 | 0.362 | 0.217 |
| 1964 | 0.406 | 0.016 | 0.361 | 0.218 |
| 1965 | 0.406 | 0.016 | 0.359 | 0.219 |
| 1966 | 0.408 | 0.015 | 0.357 | 0.219 |
| 1967 | 0.411 | 0.016 | 0.355 | 0.219 |
| 1968 | 0.414 | 0.016 | 0.352 | 0.219 |
| 1969 | 0.418 | 0.016 | 0.348 | 0.218 |
| 1970 | 0.422 | 0.016 | 0.345 | 0.218 |
| 1971 | 0.427 | 0.016 | 0.341 | 0.217 |
| 1972 | 0.432 | 0.016 | 0.336 | 0.216 |
| 1973 | 0.436 | 0.016 | 0.332 | 0.216 |
| 1974 | 0.440 | 0.016 | 0.328 | 0.216 |
| 1975 | 0.443 | 0.016 | 0.324 | 0.216 |
| 1976 | 0.447 | 0.017 | 0.321 | 0.216 |
| 1977 | 0.450 | 0.017 | 0.317 | 0.216 |
| 1978 | 0.453 | 0.018 | 0.313 | 0.217 |
| 1979 | 0.456 | 0.018 | 0.309 | 0.217 |
| 1980 | 0.459 | 0.019 | 0.305 | 0.218 |
| 1981 | 0.461 | 0.019 | 0.301 | 0.218 |
| 1982 | 0.463 | 0.020 | 0.300 | 0.218 |
| 1983 | 0.464 | 0.021 | 0.300 | 0.216 |
| 1984 | 0.463 | 0.021 | 0.301 | 0.214 |
| 1985 | 0.463 | 0.022 | 0.304 | 0.211 |
| 1986 | 0.461 | 0.022 | 0.308 | 0.208 |
| 1987 | 0.459 | 0.023 | 0.313 | 0.205 |
| 1988 | 0.457 | 0.023 | 0.318 | 0.201 |
| 1989 | 0.454 | 0.024 | 0.324 | 0.198 |
| 1990 | 0.451 | 0.025 | 0.330 | 0.194 |
| 1991 | 0.448 | 0.025 | 0.337 | 0.190 |
| 1992 | 0.445 | 0.026 | 0.345 | 0.185 |
| 1993 | 0.442 | 0.026 | 0.353 | 0.179 |
| 1994 | 0.439 | 0.027 | 0.362 | 0.172 |
| 1995 | 0.437 | 0.027 | 0.372 | 0.164 |
| 1996 | 0.434 | 0.027 | 0.382 | 0.157 |
| 1997 | 0.432 | 0.028 | 0.392 | 0.149 |
| 1998 | 0.429 | 0.028 | 0.402 | 0.141 |
| 1999 | 0.427 | 0.028 | 0.413 | 0.132 |
| 2000 | 0.424 | 0.029 | 0.423 | 0.124 |
| 2001 | 0.422 | 0.029 | 0.434 | 0.115 |
| 2002 | 0.419 | 0.029 | 0.443 | 0.108 |
| 2003 | 0.415 | 0.030 | 0.453 | 0.102 |
| 2004 | 0.411 | 0.030 | 0.462 | 0.097 |
| 2005 | 0.406 | 0.030 | 0.472 | 0.092 |
| 2006 | 0.401 | 0.031 | 0.481 | 0.088 |
| 2007 | 0.394 | 0.031 | 0.490 | 0.085 |
| 2008 | 0.385 | 0.031 | 0.500 | 0.084 |
| 2009 | 0.375 | 0.032 | 0.509 | 0.084 |
| 2010 | 0.364 | 0.032 | 0.520 | 0.084 |
| 2011 | 0.353 | 0.032 | 0.530 | 0.085 |
| 2012 | 0.342 | 0.032 | 0.540 | 0.086 |
| 2013 | 0.332 | 0.033 | 0.550 | 0.086 |
| 2014 | 0.322 | 0.033 | 0.559 | 0.086 |
| 2015 | 0.313 | 0.033 | 0.569 | 0.085 |
| 2016 | 0.304 | 0.034 | 0.578 | 0.084 |
| 2017 | 0.297 | 0.034 | 0.587 | 0.082 |
| 2018 | 0.290 | 0.035 | 0.596 | 0.079 |

# **REFERENCES**

1. WBCSD & WRI. *GHG Protocol Corporate Accounting and Reporting Standard*. https://ghgprotocol.org/corporate-standard (2004).

2. WBCSD & WRI. *Corporate Value Chain (Scope 3) Standard | GHG Protocol*. https://ghgprotocol.org/corporate-value-chain-scope-3-standard (2011).

3. United States Environmental Protection Agency (EPA). *Inventory of U.S. Greenhouse Gas Emissions and Sinks: 1990-2022*. https://www.epa.gov/ghgemissions/inventory-us-greenhouse-gas-emissions-and-sinks-1990-2022 (2024).

4. United States Environmental Protection Agency (EPA). *Annexes to Inventory of U.S. Greenhouse Gas Emissions and Sinks: 1990-2022*. https://www.epa.gov/ghgemissions/inventory-us-greenhouse-gas-emissions-and-sinks-1990-2022 (2024).

5. Heath, L. S. *et al.* Greenhouse Gas and Carbon Profile of the U.S. Forest Products Industry Value Chain. *Environ. Sci. Technol.* **44**, 3999–4005 (2010).

6. United States Environmental Protection Agency (EPA). *Annexes to Inventory of U.S. Greenhouse Gas Emissions and Sinks: 1990-2013*. https://www.epa.gov/ghgemissions/inventory-us-greenhouse-gas-emissions-and-sinks-1990-2013 (2015).

7. IPCC (Intergovernmental Panel on Climate Change). *2006 IPCC Guidelines for National Greenhouse Gas Inventories*. https://www.ipcc-nggip.iges.or.jp/public/2006gl/index.html (2006).

8. IPCC (Intergovernmental Panel on Climate Change). *Climate Change 2013: The Physical Science Basis. Contribution of Working Group I to the Fifth Assessment Report of the Intergovernmental Panel on Climate Change*. https://www.ipcc.ch/report/ar5/wg1/ (2013).

9. WBCSD & WRI. GHG Protocol Calculation Tools and Guidance. https://ghgprotocol.org/calculation-tools-and-guidance?ap3c=IGXmCH6WDeDPomoEAGXmCH6mIt-Db9NCNH00dmje0ZqebCmgPw#sector_specific_tools_id (2009).

10. United States Environmental Protection Agency (USEPA). Greenhouse Gas Reporting Program (GHGRP). https://www.epa.gov/ghgreporting (2014).

11. United States Environmental Protection Agency (EPA). *Inventory of U.S. Greenhouse Gas Emissions and Sinks: 1990-2020*. https://www.epa.gov/ghgemissions/inventory-us-greenhouse-gas-emissions-and-sinks-1990-2020 (2022).

12. United States Environmental Protection Agency (EPA). *Annexes to Inventory of U.S. Greenhouse Gas Emissions and Sinks: 1990-2020*. https://www.epa.gov/ghgemissions/inventory-us-greenhouse-gas-emissions-and-sinks-1990-2020 (2022).

13. United States Environmental Protection Agency (EPA). Emissions & Generation Resource Integrated Database (eGRID). https://www.epa.gov/egrid (2020).

14. United States Energy Information Agency (EIA). EIA (US Energy Information Administration). 2007. Instructions for Form EIA-1605 Voluntary Reporting of Greenhouse Gases. April 25, 2007. https://www.reginfo.gov/public/do/DownloadDocument?objectID=2653501 (2007).

15. United States Energy Information Administration (EIA). Manufacturing Energy Consumption Survey (MECS). https://www.eia.gov/consumption/manufacturing/.

16. United States Energy Information Adminsitration. U.S. Energy Information Administration - EIA - AEO Archive. https://www.eia.gov/outlooks/aeo/archive.php (2003).

17. American Forest and Paper Association (AF&PA). *2019 Statistics, Paper, Paperboard & Pulp*. (2020).

18. American Forest and Paper Association (AF&PA). *Capacity and Fiber Consumption - 61st Annual - 2020-2021*. (2021).

19. American Forest and Paper Association (AF&PA). *2020 Statistics, Paper, Paperboard & Pulp*. (2021).

20. United Nations Food and Agriculture Organization (FAO). FAOSTAT. https://www.fao.org/faostat/en/#home.

21. Miner, R. & Upton, B. Methods for estimating greenhouse gas emissions from lime kilns at kraft pulp mills. *Energy* **27**, 729–738 (2002).

22. AHFA | American Home Furnishings Alliance. 2021 Home Furnishings Industry Overview. https://www.ahfa.us/media/industry-facts.

23. Howard, J. L. & Liang, S. U.S. timber production, trade, consumption, and price statistics, 1965-2017. Forest Service Research Data Archive https://doi.org/10.2737/RDS-2018-0035 (2019).

24. Puettmann, M. *et al.* Comparative LCAs of Conventional and Mass Timber Buildings in Regions with Potential for Mass Timber Penetration. *Sustainability* **13**, 13987 (2021).

25. Milota, M., Science, W. & Hall, R. *Life Cycle Assessment for the Production of Southeastern Softwood Lumber*. (2020).

26. Milota, M., Science, W. & Hall, R. *Life Cycle Assessment for the Production of Pacific Northwest Softwood Lumber*. https://corrim.org/wp-content/uploads/2020/06/CORRIM-AWC-PNW-Lumber.pdf (2020).

27. National Renewable Energy Laboratory (NREL). *Life Cycle Greenhouse Gas Emissions from Electricity Generation: Update*. (2021).

28. Whitaker, M., Heath, G. A., O’Donoughue, P. & Vorum, M. Life Cycle Greenhouse Gas Emissions of Coal-Fired Electricity Generation. *Journal of Industrial Ecology* **16**, S53–S72 (2012).

29. NCASI & International Finance Corporation of the World Bank (IFC). Forest Industry Carbon Assessment Tool (FICAT). NCASI (2025).

30. Miner, R. & Unwin, J. Progress in Reducing Water Use and Wastewater Loads in the U.S. Paper Industry. *TAPPI* **74**, 5 (1991).

31. NCASI. *Solid Residual Generation and Beneficial Use, and Wastewater Treatment Performance and Practices of the North American Pulp and Paper Industry*. (2019).

32. NCASI. *Solid Waste Management and Disposal Practices in the US Paper Industry−1995*. (1999).

33. NCASI. *Unpublished Survey Data on Solid Waste Generation Rates*. (2025).

34. NCASI. *Solid Waste Management and Disposal Practices in the US Paper Industry*. (1992).

35. Electric Power Research Institute (EPRI). *Coal Ash Disposal Manual*. https://doi.org/10.2172/5310803 (1979).

36. United States Environmental Protection Agency (EPA). *Greenhouse Gas Inventory Guidance, Direct Emissions from Stationary Combustion Sources*. https://www.epa.gov/sites/default/files/2016-03/documents/stationaryemissions_3_2016.pdf (2016).

37. Someshwar, A. V. Wood and Combination Wood-Fired Boiler Ash Characterization. *Journal of Environmental Quality* **25**, 962–972 (1996).

38. RTI International. *Review of Site-Specific Industrial Waste Degradable Organic Content Data*. https://www.regulations.gov/document/EPA-HQ-OAR-2015-0526-0019 (2015).

39. Consortium for Research on Renewable Industrial Materials (CORRIM). corrim.org. https://corrim.org/.

40. United States Environmental Protection Agency (EPA). *Documentation for Greenhouse Gas Emission and Energy Factors Used in the Waste Reduction Model (WARM) - Management Practices Chapters*. https://www.epa.gov/sites/default/files/2020-12/documents/warm_management_practices_v15_10-29-2020.pdf (2020).

41. Puettmann, M., Kaestner, D. & Taylor, A. *Life Cycle Assessment for the Production of PNW Softwood Plywood*. https://corrim.org/wp-content/uploads/2020/06/CORRIM-AWC-PNW-Plywood.pdf (2020).

42. Puettmann, M., Kaestner, D. & Taylor, A. *Life Cycle Assessment for the Production of Southeast Softwood Plywood*. (2020).

43. United States Census Bureau. Commodity Flow Survey Tables. *Census.gov* https://www.census.gov/programs-surveys/cfs/data/tables.html (2025).

44. United States Census Bureau. SCTG Commodity Code List. https://bhs.econ.census.gov/bhsphpext/brdsearch/scs_code.html.

45. United States Department of Transportation. *United States 2017 Economic Census: Transportation*. https://www.census.gov/content/dam/Census/library/publications/2017/econ/ec17tcf-us.pdf (2020).

46. United Nations Food and Agriculture Organization (FAO), I. and U. N. *Forest Product Conversion Factors*. (FAO, ITTO and United Nations ;, 2020).

47. United States Department of Transportation (US DOT). Class I Rail Freight Fuel Consumption and Travel. *Class I Rail Freight Fuel Consumption and Travel* https://www.bts.gov/content/class-i-rail-freight-fuel-consumption-and-travel (2025).

48. Oneil, E. & Puettmann, M. E. A Life-Cycle Assessment of Forest Resources of the Pacific Northwest, USA*. https://doi.org/10.13073/FPJ-D-17-00011 (2017) doi:10.13073/FPJ-D-17-00011.

49. Puettmann, M., Kaestner, D. & Taylor, A. *Life Cycle Assessment for the Production of Oriented Strandboard Production*. https://corrim.org/wp-content/uploads/2020/12/CORRIM-AWC-OSB-Final.pdf (2020).

50. Bergman, R. D. & Bowe, S. A. Life-Cycle Inventory of Hardwood Lumber Manufacturing in the Northeast and North Central United States.

51. Barrett, S., Bolding, C. & Munsell, J. Characteristics of Logging Businesses across Virginia’s Diverse Physiographic Regions. *Forests* **8**, 468 (2017).

52. Conrad, J., Greene, W. & Hiesl, P. The Evolution of Logging Businesses in Georgia 1987–2017 and South Carolina 2012–2017. *Forest Science* **64**, (2018).

53. Conrad, J. L. Log truck insurance premiums, claims, and safety practices among logging businesses in the US South. *International Journal of Forest Engineering* **34**, 204–215 (2023).

54. Davis, S. C. & Boundy, R. G. Transportation Energy Data Book: Edition 40. (2022).

55. LaGore, R. What is the legal weight shippers are permitted to load cargo? https://www.inteklogistics.com/blog/what-is-legal-weight-shippers-can-load-53-trailers (2025).

56. Conrad, J. L. Evaluating Profitability of Individual Timber Deliveries in the US South. *Forests* **12**, 437 (2021).

57. United States Environmental Protection Agency (EPA). Emission Factors for Greenhouse Gas Inventories. (2014).

58. Abt, K. L., Abt, R. C., Galik, C. S. & Skog, K. E. *Effect of Policies on Pellet Production and Forests in the U.S. South: A Technical Document Supporting the Forest Service Update of the 2010 RPA Assessment*. SRS-GTR-202 https://www.fs.usda.gov/treesearch/pubs/47281 (2014) doi:10.2737/SRS-GTR-202.

59. Alderman, D. U.S. forest products annual market review and prospects, 2015-2021. *FPL-GTR-289* **289**, 1–31 (2022).

60. International Marine Organization (WMO). *Fourth IMO GHG Study 2020 - Full Report and Annexes*. 495 https://wwwcdn.imo.org/localresources/en/OurWork/Environment/Documents/Fourth%20IMO%20GHG%20Study%202020%20-%20Full%20report%20and%20annexes.pdf (2020).

61. NCASI. *Life Cycle Assessment of US Average Corrugated Product – Final Report. Report Prepared for the Corrugated Product Alliance (CPA)*. (2017).

62. NCASI. *Life Cycle Assessment of North American Printing and Writing Paper Products [Unpublished Report]*. (2010).

63. United States Department of Agriculture (USDA). FAS - Global Agricultural Trade System (GATS). https://apps.fas.usda.gov/gats/default.aspx.

64. Wang, X., Padgett, J. M., De la Cruz, F. B. & Barlaz, M. A. Wood Biodegradation in Laboratory-Scale Landfills. *Environ. Sci. Technol.* **45**, 6864–6871 (2011).

65. United States Environmental Protection Agency (EPA). *Advancing Sustainable Materials Management: 2018 Tables and Figures*. https://www.epa.gov/sites/default/files/2021-01/documents/2018_tables_and_figures_dec_2020_fnl_508.pdf (2020).

66. Staley, B. & Kantner, D. Quantification of Municipal Solid Waste Management in the United States - With Comparative Analysis to Other Estimates. *Detritus* 167 (2018) doi:10.31025/2611-4135/2018.13699.

67. Bureau of Economic Analysis (BEA). Data Tools | U.S. Bureau of Economic Analysis (BEA). https://www.bea.gov/tools.

68. United States Environmental Protection Agency (EPA). *Advancing Sustainable Materials Management: 2018 Fact Sheet*. https://www.epa.gov/sites/default/files/2021-01/documents/2018_ff_fact_sheet_dec_2020_fnl_508.pdf (2020).

69. United States Environmental Protection Agency (EPA). *Construction and Demolition Debris Management in the United States, 2015*. https://www.epa.gov/sites/default/files/2020-03/documents/final_cd-eol-management_2015_508.pdf (2020).

70. Stefanie, J. W. H. O. E., Visser, A., Pol, L. W. H. & Stams, A. J. M. Sulfate reduction in methanogenic bioreactors. *FEMS Microbiol Rev* **15**, 119–136 (1994).

71. United States Environmental Protection Agency. *Best Management Practices to Prevent and Control Hydrogen Sulfide and Reduced Sulfur Compound Emissions at Landfills That Dispose of Gypsum Drywall*. https://cfpub.epa.gov/si/si_public_record_report.cfm?Lab=NRMRL&dirEntryId=310622 (2015).

72. Staley, B. F. & Barlaz, M. A. Composition of Municipal Solid Waste in the United States and Implications for Carbon Sequestration and Methane Yield. *Journal of Environmental Engineering* **135**, 901–909 (2009).

73. United States Environmental Protection Agency (EPA). *Quantifying Methane Emissions from Landfilled Food Waste*. https://www.epa.gov/system/files/documents/2023-10/food-waste-landfill-methane-10-8-23-final_508-compliant.pdf (2023).
